# Supplementary material
Source: PubMed Central journal article supplement (PMC4809019)
Supplement: NIHMS748668-supplement-2.pdf [file NIHMS748668-supplement-2.pdf]

## **SUPPLEMENTARY NOTE**

### **A transcription activator-like effector induction system mediated by proteolysis**

Matthew F. Copeland<sup>1,2†</sup>, Mark C. Politz<sup>1†</sup>, Charles B. Johnson<sup>1,3</sup>, Andrew L. Markley<sup>1</sup>, Brian F. Pflieger<sup>1\*</sup>

<sup>1</sup> University of Wisconsin-Madison, Department of Chemical and Biological Engineering,  
3629 Engineering Hall, 1415 Engineering Drive, Madison, WI 53706, USA

<sup>2</sup> Present address: The Procter & Gamble Co., 8700 Mason Montgomery Road, Mason, OH 45040,  
USA

<sup>3</sup> Present address: Washington University in St. Louis, Department of Energy, Environmental &  
Chemical Engineering, 1 Brookings Drive, St. Louis, MO, 63130, USA

<sup>†</sup>These authors contributed equally to this work.

\* Corresponding author: Email: pflieger@wisc.edu; Fax: 608-262-5434; Tel: 608-890-1940

**Table of Contents**

**Plasmid Sequences**

Expression plasmids.....3-12  
Reporter plasmids.....13-14

**EXPRESSION PLASMIDS**

**p2A0-T (6741 bp) – Example expression plasmid containing a TALE, *tev*, and *tetR* with Kan<sup>R</sup>**

TCAGAAAACTCATGTGAGCATCAAGTGAAGTGAAGTCAATTTATTCATATCAGGATTCAATACCATATTTTTGAAAAAGCCGTTTTCT  
 GTAAATGAAGGAGAAAACTCACCGAGGCAGTTCCATAGGATGGCAAGATCCTGGTATCGGTCTGCGATTCCGACTCGTCCAACATCA  
 ATACAACCTATTAATTTCCCCTCGTCAAAAAATAAGTATTCAAGTGAGAAATCACCATGAGTGACGACTGAATCCGGTGAGAATGG  
 CAAAAGCTTATGCATTTCTTTCCAGACTTGTTCACAGGCCAGCCATTACGCTCGTCATCAAAATCACTCGCACCAACCAACCGT  
 TATTCATTCGTGATTGCGCCTGAGCGAGACGAAATACGCGATCGCCGTAAAAGGACAATTACAAACAGGAATCGAATGCAACCGG  
 CGCAGGAACACTGCCAGCGCATCAACAATATTTTACCTGAATCAGGATATTCTTCTAATACCTGGAATGCTGTTTTCCCTGGGAT  
 CGCAGTGGTGAGTAACCATGCATCATCAGGAGTACGGATAAAATGCTTGATGGTCGGAAGAGGCATAAAATCCGTCAGCCAGTTTA  
 GCCTGACCATCTCATGTAAACATCATTTGGCAAGCTTACCTTTGCCATGTTTCAGAAACAACCTCGCGCATCGCGCTTCCCATAC  
 AATCGATAGATTGTCGCACCTGATTGCCCGACATTTATCGCGAGCCATTTATACCCATATAAATCAGCATCCATGTTGGAATTTAA  
 TCGCGGCCCTCGAGCAAGAGCTTTCCCGTTGAATATGGCTCATTTTAGCTTCCCTTAGCTCCTGAAAATCTCGATAACTCAAAAAATA  
 CGCCCGGTAGTGATCTTATTTTCATTATGGTGAAAGTTGGAACCTTTACGTACTACGGCGCGGCAGCGTGACCCGTGTGGCGGC  
 TCCAACGGCTCGCCATCGTCCAGAAAACAGGCTCATCGGGCATCGGCAGGCCGCTGCTGCCCGGCCGCTTCCCATTCTCCGTTTC  
 GGTCAAGGCTGGCAGGTCTGGTTCATGCCCGGAATGCCGGGGCTGGCTGGCGGGCTCTCGCCGGGGCGGTCGGTAGTTGCTGCT  
 CGCCCGGATACAGGTCGGGATCGGGCGAGTGCATGCCAACACGCATTCGTCTGGTCTGTCATCAACCACACCGGC  
 GCCTGAAACCCAGGCGCAACTGGTCGCGGGCTGCCGCCACGCATCGCGGTATTGACCACGTCAGCCGACCGGCGCCGCGG  
 GCGTTGAGCTTACGACGAGATCCAGCGCTCGGCCACCAAGTCTTGACTGCGTATTGGACCCTCCGCAAAGAACGTCCGATGA  
 GCTTGAAAGTGTCTTCTGGCTGACCACCACGGCTTCTGGTGGCCATCTGCGCCACGAGGTGATGCAGCAGCATTGCCGCGTG  
 GGTTCCTCGCAATAAGCCCGGCCCCAGCCTCATGGCTTTGCGTTCGTTTGCACCCAGTGACCGGGCTTGTCTTGCGCTTGAAT  
 GCCGATTTCTCTGGACTGCGTGGCCATGCTTATCTCCATGCGGTAGGGTGCCGCACGGTTGCGGCACCATTGCGCAATCAGCTGCAA  
 CTTTTCCGGCAGCGCACAAACATATGCGTTGCGTAAAAGTTGGCAGTCAATTACAGATTTTCTTTAACTACGCAATGAGCTATTG  
 CGGGGGTCCGCAATGAGCTGTGGCTACCCCTTTTTTAAAGTTGTTGATTTTAAAGTTTTGCGATTTCCGCTATATCTAGT  
 TCTTTGGTGCCCAAGAAGGGCACCCTGCGGGTTCCCCACGCCTTCGCGCGGCTCCCCCTCCGGCAAAAAGTGGCCCCCTCCG  
 GGGCTTGTGATCGACTGCGCGGCTTCGGCCTTGCCAAAGTGGCGCTGCCCTTGGAAACCCCGCACTCGCCGCCGTGAGGCT  
 CGGGGGCAGGCGGGCGGGCTTCGCCTTCGACTGCCCCACTCGCATAGGCTTGGTTCGTTCCAGGCGCGTCAAGGCCAAGCCGCT  
 GCGCGTTCGCTGCGCGAGCCTTACCCGCTTCCACTTGGTGTCCAACCGGCAAGCGAAGCGCGCAGGCCGAGCCGGAGGCTTT  
 TCCCCAGAGAAAATTAATAAATTTGATGGGGCAAGGCCGAGCGCCGCGCAGTTGGAGCCGGTGGGATGTGGTCGAAGGCTGGGTA  
 GCGTTACCCGCAACAACAGATAAAAACGAAAGGCCAGTCTTCCGACTGAGCCTTTCCGTTTATTTGATGCCCTGGCTCTAGTAGT  
 GATCTACACTAGCACTATCAGTGTATTAAGACCCTTTTACATTTAAGTTGTTTCTAATCCGCAATATGATCAATCAAGGCC  
 GAATAAGAAGGCTGGCTCTGCACCTTGGTGATCAATAATTCGATAGCTTGTGTAATAATGGCGGCATACTATCAGTAGTAGGTG  
 TTTCCCTTTCTTTTACTGACTTGGTGTCTTGTCTTCCAATACGCAACCTAAAGTAAAATGCCCCACAGCGCTGAGTGCATAT  
 AATGCATTCTCTAGTGAAAACCTTGTGGCATAAAAAGGCTAATGATTTTCGAGAGTTTCATACTGTTTTTCTGTAGGCCGTGT  
 ACCTAAATGTACTTTTGTCTCCATCGCGATGACTTAGTAAAGCACAATCAAACTTTTAGCGTTATTCAGTAAAAATCTTGCCAGC  
 TTTCCCTTTCTAAAGGGCAAAAGTGAAGTATGGTGCATCTAACAATCTCAATGGCTAAGGCGTCGAGCAAAAGCCGCTTATTTTTT  
 ACATGCCAATAACAATGTAGGCTGCTTACACCTAGCTTCTGGGGAGTTTACGGGTTGTAAACCTTCGATCCGACCTCATTAAG  
 CAGCTCTAATGCGTGTAAATCACTTTACTTTTTACTAATCTAGACATCAATAATTCCTAATTTTGGTGTACACTCATATCGTTGAT  
 AGAGTTATTTTTACCCTCCATCAGTGATAGAGAAAAGAAATCAAAGATCTTTTAAAGAAGGAGATATACATATGCATCATCATC  
 ATCATCATCATGGAGAAAGCTTGTTTAAGGGCCGCGTGAATACAACCCGATATCGAGCACCATTGTGATTGGACGAATGAATCT  
 GATGGGCACACAACATCGTTGTATGGTATTGGATTGGTCCCTTCCATTACAACAAGCATTGTGTTAGAAGAAATAATGGAAC  
 ACTGTTGGTCCAATCACTACATGGTGTATTCAAGGTCAGAACACCACGACTTTGCAACAACACCTCATTGATGGGAGGGACATGA  
 TAATTATTCGCATGCCTAAGGATTTCCACCATTTCCTCAAAGCTGAAATTTAGAGAGCCACAAAGGGAAGAGCGCATATGTCTT  
 GTGACAACTTCAAACTAAGAGCATGCTAGCATGTTGTCAGCAGTTCAGATTTCCCTTTCATGATGATGCATATTTCTG  
 GAAGCATTTGATTCAAACCAAGGATGGGCGAGTGTGGCAGTCCATTAGTATCAACTAGAGATGGGTTCACTTGTGGTATATCAG  
 CATCGAATTTACCAAACAACAATAATTTCAAGCGTGCCGAAAACCTTCAAGAAATGTTGACAAATCAGGAGGCGCAGCAG  
 TGGTTAGTGGTTGGCGATTAATGCTGACTCAGTATTGTGGGGGGCCATAAAGTTTTTCATGGTGAACCTGAAGAGCTTTTCA  
 GCCAGTTAAGGAAGCGACTCAACTCATGAATCGTCGCGCTGCTAAGTCCATCAGCTTGTCCAGCAGGGTTGTCCACGGGCCG  
 AGCGAAGCGAGCCAGCCGGTGGCCGCGGAACAACTAAAGCGCCACAAGGGCGCTTTAGTTTGTFTTTCAGTCCAGTTACGCTGGA  
 GTCGTAGGCTCGTCTGAATGATATCAAGCTTGAATTCGCGGCCGCTTCTAGAGTTCAGAGCTAGCTCAGTCCTAGGGATTGTGCT  
 AGCTACTAGATATCGCTCAATACGACCAAGGAGGTATCTAATGCATCACCATCATCACCATTGTGATCTGCGTACCCTGGGTT  
 ATAGCCAGCAGCAGCAAGAAAAATCAAAACGAAAGTTCGTAGCACCGTTGCACAGCATCATGAAGCACTGGTTGGTCAAGTGT  
 ACCCATGCACATATTTTGCATGACTGAGCCAGCATCCGGCAGCACTGGGCACCCTTGCAGTTAAATATCAGGATATGATTGCAGCACT  
 GCCGAAGCAACCCATGAAGCAATTGTTGGTGTGGTAAACAGTGGTTCAGGTGCAGTGCCCTGGAAGCACTGCTGACCGTTGCCG  
 GTGAATGCGTGGTCCGCTCTGCAGCTGGATACGGTTCAGTGCAGCAATTTGAAAACGTTGGTGGTGTACCCAGTGTGAAGCA  
 GTTCAATGCATGGCCTAATCGACTGACCCGGTGCACCGCTGAATCTGACACCGGAACAGGTTGTTGCAATTTGCCAGCAATGGTGGTGG  
 CAACAGGCACTGGAAACGCTTCCAGCTTGTCCGCTGTGTTGTCAGGACATGGTCTGACCCCTGAACAGGTTGGTGGCCATTG  
 CAAGCAATAATGGCGGTAAACAAGCCCTGGAACAGGTGCAGCAGCCTGTTACCGGTGCTGTGCCAGGCCCATGGCTTAACCTCCGGAA  
 CAGGTGGTAGCGATCGCATCAAATGGCGGAGGTAACAAGCCCTTGAACACCGTACAGCAGCTTACTGCCGGTGTATGCCAGGGCGCA  
 CGGCCTGACGCCAGAACAGGTAGTGGCAATCGCCTCAAATAATGTTGAAAACAGGCGTTAGAGACAGTCCAGCAGCTGTGCCCTG  
 TATTATGTCAAGCCATGGCTGACCCAGAGCAAGTTGTTGGCATTGCAAGTAACATTGGGGGTAAACAGGCCTTGAGACAGTT  
 CAACGTTTACTGCCTGACTGTGCAAGCTCACGGTCTGACTCCGGAACAAGTCGTGCGGATTGCGAGTAATAACGGTGGCAACA  
 AGCATTAGAAAAGGTCGAACGCTGCTGCCAGTTCTTTGCCAGGCTCACGGTTTAAACCCCTGACGAGTGTAGCTATTGCGAGCT

ATGATGGTGGTAAGCAGGCGTTGAAAACCTGTGCAAAGACTGCTGCCCGTGTGTGCCAAGCACATGGTTAACCCAGAACAAAGT  
GTAGCAATCGCAAGCAATCATGGTGCAAGCAAGCGCTTGAACAGTACAGCGTTATTACCGGTACTTTGTACAGCCACCGGTCT  
TACACCAGAACAAGTTGTGGCCATAGCCAGTAACAATGGCGGAAAGCAGGCTCTGAAAACGGTACAACGTCTGTTACCTGTTCTGT  
GTCAAAGCGCACGGATTAACACCTGAACAAGTAGTTGCCATTGCGTCAAATATCGGAGGCAAGCAGGCCTTGAGACAGTGCAGAGA  
TTACTGCCAGTGTGTGTAGGCTCATGGCCTTACACCCGAGCAGGTCGTGGCAATTGCATCTAATGGTGGCGGTAAAGCAAGCTTT  
AGAGACTGTTTACAGACTGCTTCCCTGTCTGTGCCAGGCACACGGACTTACGCCTGAGCAAGTGGTTGCAATCGCCTTAACATCG  
GTGGTAAGCAAGCACTGAAAACCTGCAACGCTTACTTCCGGTGTCTTGTCAAGCACACGGCTTAACGCCAGAGCAGGTGTCGCC  
ATAGCCAGCAATATCGGTGGTAAACAGGCCCTTGAACCGGTCCAAAGACTTCTGCCGGTCTTTTGCAAGCGCATGGGCTGACACC  
TGAGCAGGTAGTCCGATGTCCTACATGACGGTGGGAAGCAGGCATTAGAAACAGTTCAAAGATTATTACCAGTCTGTGTCCAGG  
CGCATGGGTTAACCCAGAGCAGGTAGTTGCAATAGCATCCAACATTTGGCGGAAAAACAAGCGTTGAAAACGGTTACAGCGTTATTG  
CCTGTTTTGTGCCAGGCGCATGGTTTGACACCCGAGCAAGTGGTAGCCATAGCCTCAAATATAGGGGGTAAACAAGCTTTGGAGAC  
AGTACAACGGCTGCTTCCAGTTTTATGTAGGCCCATGGATTGACGCCTGAACAAGTTGTCGCTATCGCAAGTAATGGGGGTGGTA  
AACAGCGCTTGAACCGTTCAACGCCTTCTGCCTGTGCTTTGTGAGGCACATGGATTAAACCCGAAACAGGTTGTCGCGATAGCT  
TCAAACGGTGGTGGTCTCCGGCACTGGAAAGCATTGTTGCACAGCTGAGCCGTCGGATCCGGCACTGGCAGCACTGACCAATGA  
TCATCTGGTTGCATGGCATGTCTGGTGGTCCCTGCCCTGGATGCAGTTAAAAAGGTTCTGCCGCATGCACGGCACTGATTA  
AACGTACCAATCGTCGTATTCCGGAACGTACCAGCCATCGTGTTCGAGATCATGCACAGGTTGTTCTGTGTTCTGGGTTTTTTTTCAG  
TGTCATAGCCATCCGGCACAGGCATTTGATGATGCAATGACCCAGTTTGGTATGAGCGATTATAAAGATGATGATAAATAAGG  
TACCCTAATCATACCTGACCTCCATAGCAGAAAGTCAAAAACCTCCGACCGGAGGCTTTTGACTTGAGGGGGATCCGCC

## Sequence of expression plasmid components and each variant

### TlacO and its variants

#### **A0 – TlacO, no TEV sites (2535 bp)**

ATGCATCACCATCATCACCATGTTGATCTGCGTACCCTGGGTTATAGCCAGCAGCAGCAAGAAAAATCAAACCGAAAAGTTTCGTAG  
CACCGTTGCACAGCATCATGAAGCACTGGTTGGTTCATGGTTTTACCCATGCACATATTGTTGCACTGAGCCAGCATCCGGCAGCAC  
TGGGCACCGTTGCAGTTAAATATCAGGATATGATTGCAGCACTGCCGGAAGCAACCCATGAAGCAATTGTTGGTGTGGTAAACAG  
TGGTCAGGTGCACGTGCCCTGGAAGCACTGCTGACCGTTGCCGGTGAAGTGCCTGCTGCAGCTGGATACCGGTCAGCT  
GCTGAAAATTGCAAACGTGGTGGTGTACCAGCAGTTGAAGCAGTTTCATGCATGGCGTAATGCATGACCGGTGACCGCTGAATC  
TGACACCGGAAACAGGTTGTTGCAATTGCCAGCAATGGTGGTGGCAACAGGCCTGAAAACCGTTACAGCTCTGCTGCCGGTTCTG  
TGTGAGGCACATGGTCTGACCCCTGAACAGGTGGTGGCCATTGCAAGCAATAATGGCGGTAACAAGCCCTGAAAACAGTGCAGCG  
CCTGTTACCGGTTGCTGCCAGGCCATGGCTTAACTCCGGAACAGGTGGTAGCGATCGCATCAAATGGCGGAGGTAAACAGGCCCT  
TAGAAACCGTACAGCGCTTACTGCCGGTGTATGCCAGGCGCACGGCCTGACGCCAGAACAGGTAGTGGCAATCGCCTCAAATAAT  
GGTGGAAAACAGGCGTTAGAGACAGTCCAGCGCTGCTGCCTGTATTATGTCAAGCCATGGCTGACCCAGAGCAAGTTGTTGC  
GATTGCAAGTAACATTGGGGGTAACAGGCCTTGAGACAGTTCAACGTTTACTGCTGTACTGTGCAAGCTCAGGCTGACTC  
CGAACAAAGTCTGCGGATGCGAGTAATAACGGTGGCAACAAGCATTAGAAACGGTGAACCGCTGCTGCCAGTCTTTGCCAG  
GCTCACGGTTTAAACCCCTGAGCAGGTTGTAGCTATTGCGAGTCATGATGGTGGTAAAGCAGGCGTTGAAAACCTGTGCAAAGACTGCT  
GCCCGTGTGTGCCAAGCACATGGTTTAAACCCAGAACAGTCTGAGCAATCGCAAGCAATCATGGTGGCAAGCAAGCGCTTGAAA  
CAGTACAGCGTTTTATTACCGGTACTTTGTGAGGCCACGGCTTACACCCAGAACAGTTGTTGGCCATAGCCAGTAAACAATGGCGGA  
AAGCAGGCTCTGAAAACGGTACAACGTCTGTTACCTGTTCTGTGTCAAGCGCACGGATTAAACCTGAACAAGTAGTTGCCATTGC  
GTCAAATATCGGAGGCAAGCAGGCCTTGAGACAGTGCAGAGATTACTGCCAGTGTGTGTGAGGCTCATGGCCTTACACCCGAGC  
AGGTCGTGGCAATTGCATCTAATGGTGGCGGTAAGCAAGCTTTAGAGACTGTTGAGAGACTGCTTCTGTCTGTGCCAGGCACAC  
GGAATTACGCCTGAGCAAGTGGTTGCAATCGCCTTAACATCGGTGGTAAGCAAGCACTGAAAACCTGTTCAACGCTTACTTCCGGT  
GCTTTGTCAAGCACACGGCTTAAACCCAGAGCAGGTGCTGCCATAGCCAGCAATATCGGTGGTAAACAGGCCCTTGAACCGGTCC  
AAAGACTTCTGCCGGTCTTTTGCCAAGCGCATGGCTGACACCTGAGCAGGTAGTCCGATTTGCCATGACCGGTGGGAAGCAG  
GCATTAGAAAACAGTTCAAAGATTATTACCAGTCTGTGTGAGGCCATGGGTTAAACCCAGAGCAGGTAGTTGCAATAGCATCCAA  
CATTTGGCGGAAAACAAGCGTTGAAAACGGTTACAGCGTTATTGCTGTTTTGTGCCAGGCGCATGGTTTGACACCCGAGCAAGTGG  
TAGCCATAGCCTCAAATATAGGGGGTAAACAAGCTTTGGAGACAGTACAACGGCTGCTTCCAGTTTTATGTGAGGCCCATGGATTG  
ACGCCGAAACAAGTTGTCGCTATCGCAAGTAATGGGGGTGGTAAACAAGCGCTTGAACCGTTCAACGCCTTCTGCCTGTGCTTTG  
TCAGGCACATGGATTAAACCCGAAACAGGTTGTCGCGATAGCTTCAAACGGTGGTGGTCTCCGGCACTGGAAAGCATTGTTGCAC  
AGCTGAGCCGTCGGATCCGGCACTGGCAGCACTGACCAATGATCATCTGGTTGCCTGGCATGTCTGGTGGTCCGCCCTGCCCTG  
GATGCAGTTAAAAAGGTTCTGCCGATGCACCGCATGATTAACAGTACCAATCGTTCGTTATCCGGAACAGTACCAGCCATCGTGT  
TGCAGATCATGCACAGGTTGTTCTGTGTTTTTTTTCAGTGTGCATAGCCATCCGGCACAGGCATTTGATGATGATAAATAAG  
AGTTTTGGTATGAGCGATTATAAAGATGATGATGATAAATAA

#### **A1 – 3 TEV recognition sites between repeats 4/5, 9/10, and 14/15 (2598 bp)**

ATGCATCACCATCATCACCATGTTGATCTGCGTACCCTGGGTTATAGCCAGCAGCAGCAAGAAAAATCAAACCGAAAAGTTTCGTAG  
CACCGTTGCACAGCATCATGAAGCACTGGTTGGTTCATGGTTTTACCCATGCACATATTGTTGCACTGAGCCAGCATCCGGCAGCAC  
TGGGCACCGTTGCAGTTAAATATCAGGATATGATTGCAGCACTGCCGGAAGCAACCCATGAAGCAATTGTTGGTGTGGTAAACAG  
TGGTCAGGTGCACGTGCCCTGGAAGCACTGCTGACCGTTGCCGGTGAAGTGCCTGCTGCAGCTGGATACCGGTCAGCT  
GCTGAAAATTGCAAACGTGGTGGTGTACCAGCAGTTGAAGCAGTTTCATGCATGGCGTAATGCATGACCGGTGACCGCTGAATC

TGACACCGGAACAGGTTGTTGCAATTGCCAGCAATGGTGGTGGCAAACAGGCACCTGGAAACCGTTACAGCTCTGCTGCCGGTTCTG  
 TGTCAGGCACATGGTCTGACCCCTGAACAGGTGGTGGCCATTGCAAGCAATAATGGCGGTAACAAAGCCCTGGAAACAGTGCAGCC  
 CCTGTTACCGGTGCTGTGCCAGGCCATGGCTTAACTCCGGAACAGGTGGTAGCGATCGCATCAAATGGCGGAGGTAACAGGCCCT  
 TAGAAACCGTACAGCGCTTACTGCCGGTGTATGCCAGGCGCAGGCCCTGACGCCAGAACAGGTAGTGGCAATCGCCTCAAATAAT  
 GGTGGAAACAGCGCTTAGAGACAGTCCAGCGCCTGCTGCCTGTTATATGTCAAGCCCATGGCgaaaacctgtatTTTcaagcCT  
 GACCCAGAGCAAGTTGTTGCGATTGCAAGTAACATTGGGGGTAAACAGGCACCTGAGACAGTTCAACGTTTACTGCTGTACTGT  
 GCCAAGCTCACGGTCTGACTCCGGAACAAGTCGTCGCGATTGCGAGTAATAACGGTGGCAAACAAGCATTAGAAACGGTGAACGC  
 CTGCTGCCAGTTCTTTGCCAGGCTCACGGTTAAACCCCTGAGCAGGTTGTAGCTATTGCGAGTCAATGATGGTGGTAAGCAGGCGTT  
 GGAACTGTGCAAAGACTGCTGCCCGTGTGTGCCAAGCACATGGTTAAACCCAGAACAGTCGTAGCAATCGCAAGCAATCATG  
 GTGGCAAGCAAGCGCTTGAACAGTACAGCGTTTATTACCGGTACTTTGTGTCAGGCCACGGTCTTACACCAGAACAAAGTTGTGGCC  
 ATAGCCAGTAACAATGGCGGAAAGCAGGCTCTGGAAACGGTACAAGTCTGTACCTGTTCTGTGTCAAGCGCACGGAgaaaattt  
 atactttcagggtTTAACCCCTGAACAAGTAGTTTACCGTATGCGTCAAATATCGGAGGCAAGCAGGCCCTGGAGACAGTGCAGAGAT  
 TACTGCCAGTGTGTGTCAGGCTCATGGCCTTACACCCGAGCAGGTCGTGGCAATTGCATCTAATGGTGGCGGTAAGCAAGCTTTA  
 GAGACTGTTTCAAGACTGCTTCCGTGCTGTGCCAGGCACACGGACTTACGCCGTGAGCAAGTGGTTGCAATCGCCTTAACATCGG  
 TGGTAAGCAAGCACTGAAACTGTCCAACGCTTACTTCCGGTGTCTTGTCAAGCACAGGCTTAAACCCAGAGCAGGTCGTGCCA  
 TAGCCAGCAATATCGGTGGTAAACAGGCCCTTGAACGGTCCAAGACTTCTGCCGGTCTTTGCCAAGCGCATGGGCTGACACCT  
 GAGCAGGTAGTCGGATTGCTTCACATGACCGTGGGAAGCAGGCATTAGAACAAGTCAAAGATTATTACCAGTCTCTGTGTCAGG  
 GCATGGGgagaactgtatTTcagggtTTAACCCAGAGCAGGTAGTTGCAATAGCATCCAACATTGGCGGAAACAAGCCTTGG  
 AAACGGTTCAGCGGTTATTGCTGTTTGTGCCAGGCGCATGGTTGACACCCGAGCAAGTGGTAGCCATAGCCTCAAATATAGGG  
 GGTAAACAAGCTTTGGAGACAGTACAACGGCTGCTTCCAGTTTATGTGAGGCCCATGGATTGACGCTGAACAAGTTGTGCTAT  
 CGCAAGTAATGGGGTGGTAAACAAGCGCTTGAACCGTTCAACGCTTCTGCCTGTGCTTTGTGAGGCACATGGATTAACACCCG  
 AACAGGTTGTGCGATAGCTTCAAACGGTGGTGGTCTCCGGCCTGGAAAGCATGTTGACACAGCTGAGCCGTCGGATCCGGCA  
 CTGGCAGCACTGACCAATGATCATCTGGTGTGACTGGCATGTCTGGGTGGTCCGCTGCCCTGGATGCAGTTAAAAAGGTTCTGCC  
 GCATGCACCGGCACTGATTAACGTACCAATCGTCGATTCCGGAACGTACCAGCCATCGTGTGAGATCATGCACAGGTTGTT  
 GTGTTCTGGGTTTTTTTCAGTGTCTATAGCCATCCGGCACAGGCATTTGATGATGCAATGACCCAGTTTGGTATGAGCGATTATAAA  
 GATGATGATGATAAATAA

## A2 – TEV recognition site in the N-terminus (2556 bp)

ATGCATCACCATCATCACCATGTTGATCTGCGTACCCTGGGTTATAGCCAGCAGCAGCAAGAAAAATCAAACCGAAAGTTTCGTAG  
 CACCGTTGCACAGCATCATGAAGCACTGGTGGTTCATGGTTTTACCATGCACATATTGTTGCACTGAGCCAGCATCCGGCAGCAC  
 TGGGCACCGTTGCAGTTAAATATCAGGATATGATTCGAGCACTGCCGGAAGCAACCCATGAAGCAATTGTTGGTGTGGTAAACAG  
 TGGTCAGGTGCACGTGCCCTGGAAGCACTGCTGACCGTTGCCGGTGAACGCTGCTGGTCCGCTCTGCAGCTGGATACCGGTCAGCT  
 GCTGAAAATTGCAAAACGTGGTGGTGTACCAGCAGTTGAAGCAGTTCATGCATGGCGTAATGCATGACCGGTGCACCGCTGAATg  
 aaaacctgtacttccagtctCTGACACCGGAACAGGTTGTTGCAATTGCCAGCAATGGTGGTGGCAAACAGGCACCTGGAAACCGTT  
 CAGCGTCTGCTGCCGGTCTGTGTCAGGCACATGGTCTGACCCCTGAACAGGTGGTGGCCATTGCAAGCAATAATGGCGGTAACA  
 AGCCCTGGAAACAGTGCAGCGCTGTTACCGGTGCTGTGCCAGGCCATGGCTTAACTCCGGAACAGGTGGTAGCGATCGCATCAA  
 ATGGCGGAGGTAACAGGCCTTAGAAACCGTACAGCGCTTACTGCCGGTGGTATGCAAGCGCACGGCCTGACGCCAGAACAGGTA  
 GTGGCAATCGCCTCAAATAATGGTGGAAACAGGCGTTAGAGACAGTCCAGCGCTGCTGCCTGTATTATGTCAAGCCATGGCCT  
 GACCCAGAGCAAGTTGTTGCGATTGCAAGTAACATTGGGGGTAAACAGGCACCTGAGACAGTTCAACGTTTACTGCTGTACTGT  
 GCCAAGCTCACGGTCTGACTCCGGAACAAGTCGTCGCGATTGCGAGTAATAACGGTGGCAAACAAGCATTAGAAACGGTGAACGC  
 CTGCTGCCAGTTCTTTGCCAGGCTCACGGTTAAACCCCTGAGCAGGTTGTAGCTATTGCGAGTCAATGATGGTGGTAAGCAGGCGTT  
 GGAACTGTGCAAAGACTGCTGCCCGTGTGTGCCAAGCACATGGTTAAACCCAGAACAGTCGTAGCAATCGCAAGCAATCATG  
 GTGGCAAGCAAGCGCTTGAACAGTACAGCGTTTATTACCGTACTTTGTGTCAGGCCACGGTCTTACACCAGAACAAAGTTGTGGCC  
 ATAGCCAGTAACAATGGCGGAAAGCAGGCTCTGGAAACGGTACAAGTCTGTACCTGTTCTGTGTCAAGCGCACGGATTAACACC  
 TGAACAAGTAGTTGCCATTGCGTCAAATATCGGAGGCAAGCAGGCCCTGGAGACAGTGCAGAGATTACTGCCAGTGTGTGTCAGG  
 CTCATGGCCTTACACCCGAGCAGGTCGTGGCAATTGCATCTAATGGTGGCGGTAAGCAAGCTTTAGAGACTGTTTACAGACTGCTT  
 CCTGTCTGTGCCAGGCACACGGACTTACGCCTGAGCAAGTGGTTGCAATCGCCTTAACATCGGTGGTAAAGCAAGCACTGGAAAC  
 TGTCCAACGCTTACTTCCGGTGTCTTGTCAAGCACAGGCTTAAACCCAGAGCAGGTCGTGCCATAGCCAGCAATATCGGTGGTA  
 AACAGGCCCTTGAACGGTCCAAGACTTCTGCCGGTCTTTGCCAAGCGCATGGGCTGACACCTGAGCAGGTAGTCGGATTGCC  
 TCACATGACGGTGGGAAGCAGGCATTAGAAACAGTTCAAAGATTATTACCAGTCTGTGTGTCAGGCCATGGGTTAAACCCAGAGCA  
 GGTAGTTGCAATAGCATCCAACATTGGCGGAAACAAGCGTTGGAAACGGTTTACGCGGTTATTGCTGTTTTGTGCCAGGCGCATG  
 GTTTGACACCCGAGCAAGTGGTAGCCATAGCCTCAAATATAGGGGTAAACAAGCTTTGGAGACAGTACAACGGCTGCTTCCAGTT  
 TTATGTCAGGCCATGGATTGACGCTGAACAAGTTGTGCTATCGCAAGTAATGGGGTGGTAAACAAGCGCTTGAACCGTTCA  
 ACGCTTCTGCCTGTGCTTTGTGTCAGGCACATGGATTAACACCCGAAAGGTTGTGCGGATAGCTTCAAACGGTGGTGGTCTCCGG  
 CACTGGAAAGCATGTTGTCACAGCTGAGCCGTCGGATCCGGCCTGCGCAGCACTGACCAATGATCATCTGGTGTGACTGGCATGT  
 CTGGTGGTCCGCTGCCCTGGATGCAGTTAAAAAGGTTCTGCCGATGCAACCGGCACTGATTAACAGTACCAATCGTCGATTTCC  
 GGAACGTACCAGCCATCGTGTGGAGATCATGCACAGGTTGTTCTGTTCTGGGTTTTTTTTCAGTGTGCATAGCCATCCGGCACAGG  
 CATTTGATGATGCAATGACCCAGTTTGGTATGAGCGATTATAAAGATGATGATGATAAATAA

## A3 – TEV recognition site with flanking Gly-Ser-Gly residues in the N-terminus (2574 bp)

ATGCATCACCATCATCACCATGTTGATCTGCGTACCCTGGGTTATAGCCAGCAGCAGCAAGAAAAATCAAACCGAAAGTTTCGTAG  
CACCGTTGCACAGCATCATGAAGCACTGGTTGGTCATGGTTTTACCCATGCACATATTGTTGCACTGAGCCAGCATCCGGCAGCAC  
TGGGCACCGTTGCAGTTAAATATCAGGATATGATTGCAGCAGTCCGGAAGCAACCCATGAAGCAATTGTTGGTGTGGTAAACAG  
TGGTCAGGTGCAGTGCCTGGAAGCACTGCTGACCGTTGCCGGTGAAGTCCGTCGGTCCGCCCTGCAGCTGGATACCGGTACAGT  
GCTGAAAAATTGCAAAACGTGGTGGTTACCAGCAGTTGAAGCAGTTTCATGCATGGCGTAATGCACAGCCGGTGACCCGCTGAATg  
gttctggcgaaaacctgtacttccagtctggtctcggtCTGACACCGGAACAGGTTGTTGCAATTGCCAGCAATGGTGGTGGCAA  
CAGGCACTGGAAACCGTTACGCGTCTGCTGCCGGTTCTGTGTGAGGCACATGGTCTGACCCCTGAACAGGTGGTGGCCATTGCAAG  
CAATAATGGCGGTAAACAAGCCCTGGAACAGTGCAGCGCCTGTTACCGGTGCTGTGCCAGGCCATGGCTTAACTCCGGAACAGG  
TGGTAGCGATCGCATCAAATGGCGGAGGTAAACAGGCCTTAGAAACCGTACAGCGCTTACTGCCGGTGTATGCCAGGCGCACGGC  
CTGACGCCAGAACAGGTAGTGGCAATCGCCTCAAATAATGGTGGAAAAAGCGCTTAGAGACAGTCCAGCGCCTGCTGCCTGTATT  
ATGTCAGCCCATGGCTGACCCAGAGCAAGTTGTTGCGATTGCAAGTAACATTGGGGGTAACAGCAAGTTCAGACAGTTCAAC  
GTTTACTGCCTGTACTGTGCCAAGCTCACGGTCTGACTCCGGAACAAGTCTGCGGATTGCGAGTAATAACGGTGCAAAACAAGCA  
TTAGAAACGGTGCACGCCTGCTGCCAGTTCTTTGCCAGGCTCACGGTTAACCCCTGAGCAGGTTGTAGCTATTGCGAGTCATGA  
TGGTGGTAAAGCAGGCGTTGGAACACTGTGCAAGACTGCTGCCCGTGTGTGCCAAGCACATGGTTAACCCCAAGCAAGTTCGTAG  
CAATCGCAAGCAATCATGGTGGCAAGCAAGCGCTTGAACAGTACAGCGTTTATTACCGGTACTTGTGACAGCCACCGGTCTTACA  
CCAGAACAAGTTGTGGCCATAGCCAGTAACAATGGCGGAAAGCAGGCTCTGAAACCGTACAACGCTCTGTTACCTGTTCTGTGTCA  
AGCGCAGGTAACACACTGAACAAGTAGTTGCCATTGCGTCAAATATCGGAGGCAAGCAGCCCTGGAGACAGTGCAGAGATTAC  
TGCAGCTGTTGTGTGAGCTCATGGCCTTACACCCGAGCAGGTGGCAATTGCATCTAATGGTGGCGTAAGCAAGCTTTAGAG  
ACTGTTACAGAGACTGCTTCTGTCTGTGCCAGGCACACGGACTTACGCTGAGCAAGTGGTTGCAATCGCCTCTAACATCGGTGG  
TAAGCAAGCACTGGAAACTGTCCAACGCTTACTTCCGGTGTCTTGTCAAGCACACGGCTTAAACGCCAGAGCAGGTCGTGCCATAG  
CCAGCAATATCGGTGGTAAACAGGCCCTTGAACCGTCCAAAGACTTCTGCCGGTCTTTGCCAAGCGCATGGGCTGACACCTGAG  
CAGGTAGTCGCGATTGCCCTCACATGACGGTGGGAAGCAGGCATTAGAAACAGTTCAAAGATTATTACCAGTCCCTGTGTGAGGCGCA  
TGGGTTAACCCAGAGCAGGTAGTTGCAATAGCATCCAACATGGCGGAAACAAGCGTTGGAACCGGTTACGCGGTTATTGCCCTG  
TTTTGTGCCAGGCGCATGGTTGACACCCGAGCAAGTGGTAGCCATAGCCCAAATATAGGGGGTAAACAAGCTTTGGAGACAGTA  
CAACGCTGCTTCCAGTTTATGTGTCAGGCCCATGGATTGACGCCCTGAACAAGTTGTCGCTATCGCAAGTAATGGGGGTGGTAAACA  
AGCGCTTGAACCGGTTCAACGCCTTCTGCCTGTGCTTTGTGAGGCACATGGATTAAACCCGAACAGGTTGTGCGGATAGCTTCAA  
ACGGTGGTGGTCTGCCGCACTGGAAAGCATTGTTGCACAGCTGAGCCGTCGGATCCGGCACTGGCAGCACTGACCAATGATCAT  
CTGGTGCAGTGGCATGTCTGGGTGGTCGCCCTGCCCTGGATGCAGTTAAAAAAGTCTGCCGCATGCACCGGCACTGATTAACG  
TACCAATCGTCTGATTCGGGAACGTACCAGCCATCGTGTGAGATCATGCACAGGTTGTTCCGTGTTCTGGGTTTTTTTTCAGTGT  
ATAGCCATCCGGCACAGGCATTTGATGATGCAATGACCCAGTTGGTATGAGCGATTATAAAGATGATGATGATAAATAA

#### A4 – TEV recognition site in the C-terminus (2556 bp)

ATGCATCACCATCATCACCATGTTGATCTGCGTACCCTGGGTTATAGCCAGCAGCAGCAAGAAAAATCAAACCGAAAGTTTCGTAG  
CACCGTTGCACAGCATCATGAAGCACTGGTTGGTCATGGTTTTACCCATGCACATATTGTTGCACTGAGCCAGCATCCGGCAGCAC  
TGGGCACCGTTGCAGTTAAATATCAGGATATGATTGCAGCAGTCCGGAAGCAACCCATGAAGCAATTGTTGGTGTGGTAAACAG  
TGGTCAGGTGCAGTGCCTGGAAGCACTGCTGACCGTTGCCGGTGAAGTCCGTCGGTCCGCCCTGCAGCTGGATACCGGTACAGT  
GCTGAAAAATTGCAAAACGTGGTGGTTACCAGCAGTTGAAGCAGTTTCATGCATGGCGTAATGCACAGCCGGTGACCCGCTGAATC  
TGACACCGGAACAGGTTGTTGCAATTGCCAGCAATGGTGGTGGCAAACAGGCACTGGAAACCGGTTACAGCGTCTGCTGCCGGTTCTG  
TGTGAGGCACATGGTCTGACCCCTGAACAGGTGGTGGCCATTGCAAGCAATAATGGCGGTAAACAAGCCCTGGAACAGTGCAGCG  
CCTGTTACCGGTGCTGTGCCAGGCCATGGCTTAACTCCGGAACAGGTGGTAGCGATCGCATCAAATGGCGGAGGTAAACAGGCCT  
TAGAAACCGTACAGCGCTTACTGCCGGTGTATGCCAGGCGCACGGCCTGACGCCAGAACAGGTAGTGGCAATCGCCTCAAATAAT  
GGTGGAAAACAGCGCTTAGAGACAGTCCAGCGCCTGCTGCCTGTATTATGTCAAGCCCATGGCTGACCCAGAGCAAGTTGTTGC  
GATTGCAAGTAACATTGGGGGTAACAGGCACCTGAGCAGTTCAACGTTTACTGCTGTACTGTGCCAAGCTCACGGTCTGACTC  
CGAACAAGTCTGCGGATTGCGAGTAATAACGGTGGCAAACAAGCATTAGAAACGGTGAACGCTGCTGCCAGTTCTTTGCCAG  
GCTCACGGTTTAAACCCCTGAGCAGGTTGTAGCTATTGCGAGTCATGATGGTGGTAAAGCAGGCGTTGGAAACTGTGCAAGACTGCT  
GCCCGTGTGTGCCAAGCACATGGTTAACCCCAAGCAAGTTCGTAGCAATCGCAAGCAATCATGGTGGCAAGCAAGCGCTTGA  
CAGTACAGCGTTTTATTACCGGTACTTGTGACAGCCACGGTCTTACACCAGAACAAGTTGTGGCCATAGCCAGTAACAATGGCGGA  
AAGCAGGCTCTGGAACCGGTACAACGCTCTGTTACCTGTTCTGTGTCAAGCGCACGGATTAAACCTGAACAAGTAGTTGCCATTGC  
GTCAAATATCGGAGGCAAGCAGGCTTGGAGACAGTGCAGAGATTACTGCCAGTGTGTGTGAGGCTCATGGCCTTACACCCGAGC  
AGGTCGTGGCAATTGCATCTAATGGTGGCGGTAAGCAAGCTTTAGAGACTGTTTCAGAGACTGCTTCCGTGCTGTGCCAGGCACAC  
GGACTTACGCTGAGCAAGTGGTTGCAATCGCCTTAAACATCGGTGGTAAAGCAAGCACTGGAAACTGTCCAACGCTTACTTCCGGT  
GCTTTGTCAAGCACACGGCTTAAACGCCAGAGCAGGTCGTGCCATAGCCAGCAATATCGGTGGTAAACAGGCCCTTGAACCGTCC  
AAAGACTTCTGCCGGTCTTTGCCAAGCGCATGGGCTGACACCTGAGCAGGTAGTCGCGATTGCCTCACATGACGGTGGGAAGCAG  
GCATTAGAAACAGTTCAAAGATTATTACCAGTCCCTGTGTGACGGCCATGGGTTAACCCAGAGCAGGTAGTTGCAATAGCATCCAA  
CATTTGGCGGAAAACAAGCGTTGGAACCGGTTACGCGGTTATTGCCCTGTTTGTGCCAGGCGCATGGTTTGCACCCGAGCAAGTGG  
TAGCCATAGCCTCAAATATAGGGGGTAAACAAGCTTTGGAGCAGTACAACCGGCTGCTTCCAGTTTATGTGTCAGGCCCATGGATTG  
ACCGCTGAACAAGTTGTGCTGATCGCAAGTAATGGGGTGGTAAACAAGCGCTTGAACCGGTTCAACGCTTCTGCGCTGTGCTTTG  
TCAGGCACATGGATTAAACCCGAACAGGTTGTGCGGATAGCTTCAAACGGTGGTGGTCTGCCGCACTGGAAAGCATTGTTGCAC  
AGCTGAGCCGTCGGATCCGGCAgaaaacctgtatttccaatctCTGGCAGCACTGACCAATGATCATCTGGTTGCACTGGCATGT  
CTGGTGGTTCGCCCTGCCCTGGATGCAGTTAAAAAAGTCTGCCGCATGCACCGGCACTGATTAACGTACCAATCGTCTGATTTCC  
GGAACGTACCAGCCATCGTGTGAGATCATGCACAGGTTGTTCCGTGTTCTGGGTTTTTTTTCAGTGTGATGATGATAAATAA  
CATTTGATGATGCAATGACCCAGTTGGTATGAGCGATTATAAAGATGATGATGATAAATAA

### A5 – TEV recognition site with flanking Gly-Ser-Gly residues in the C-terminus (2574 bp)

ATGCATCACCATCATCACCATGTTGATCTGCGTACCCTGGGTTATAGCCAGCAGCAGCAAGAAAAATCAAACCGAAAAGTTTCGTAG  
CACCGTTGCACAGCATCATGAAGCACTGGTTGGTCATGGTTTTTACCCATGCACATATTGTTGCACTGAGCCAGCATCCGGCAGCAC  
TGGGCACCGTTGCAGTTAAATATCAGGATATGATTGCAGCACTGCCGGAAGCAACCCATGAAGCAATTGTTGGTGTGGTAAACAG  
TGGTCAGGTGCACGTGCCCTGGAAGCACTGCTGACCGTTGCCGGTGAAGTGCCTGGTCCGCTCTGCAGCTGGATACCGGTCAGCT  
GCTGAAAATTGCAAACGTGGTGGTGTACCCGAGTTGAAGCAGTTCATGCATGGCGTAATGCCTGACCGGTCACCGCTGAATC  
TGACACCGGAACAGGTTGTTGCAATTGCCAGCAATGGTGGTGGCAAACAGGCACTGGAAACCGTTTCAGCGTCTGCTGCCGGTTCTG  
TGTCAGGCACATGGTCTGACCCCTGAACAGGTGGTGGCCATTGCAAGCAATAATGGCGGTAACAAGCCCTGGAAAACAGTGCAGCG  
CCTGTTACCGGTTGCTGCCAGGCCATGGCTTAACCTCCGGAACAGGTGGTAGCGATCGCATCAAATGGCGGAGGTAACAAGGCCCT  
TAGAAAACCGTACAGCGCTTACTGCCGGTGTATGTCAGGCGCACGGCCTGACGCCAGAACAGGTAGTGGCAATCGCCTCAAATAAT  
GGTGGAAAACAGGCGTTAGAGACAGTCCAGCGCCTGCTGCCTGTATTATGTCAAGCCCATGGCTGACCCAGAGCAAGTTGTTGC  
GATTGCAAGTAACATTGGGGGTAACAAGGCACCTTGAGACAGTTCAACGTTTACTGCTGTACTGTGCCAAGCTCAGCGTCTGACTC  
CGGAACAAGTCTCGCGATTGCGAGTAATAACGGTGGCAAACAAGCATTAGAAAACGGTGAACCGCTGCTGCCAGTTCTTTGCCAG  
GCTCACGGTTTAACCCCTGAGCAGGTTGTAGCTATTGCGAGTCATGATGGTGGTAAAGCAGGCGTTGGAAACTGTGCAAAGACTGCT  
GCCCGTGTGTGCCAAGCAGCATGGTTTAACCCAGAACAAAGTCTAGCAATCGCAAGCAATCATGGTGGCAAGCAAGCGCTGAAA  
CAGTACAGCGTTTATTACCGGTACTTGTGTCAGGCCACGGTCTTACACCAAGAACAGTTGGCCATAGCCAGTAAACATGGCGGA  
AAGCAGGCTCTGGAACCGGTACAACGTCTGTTACCTGTTCTGTGTCAAGCGCACGGATTAAACCTGAACAAGTAGTTGCCATTGC  
GTCAAATATCGGAGGCAAGCAGGCTTGGAGACAGTGCAGAGATTACTGCCAGTGTGTGTGTCAGGCTCATGGCCTTACACCCGAGC  
AGGTCGTGGCAATTGCATCTAATGGTGGCGGTAAGCAAGCTTTAGAGACTGTTTCAGAGACTGCTTCTGTCTGTGCCAGGCACAC  
GGAATTACGCCTGAGCAAGTGGTTGCAATCGCCTTAACATCGGTGGTAAGCAAGCAAGCAAGTGTCCAACGCTTACTTCCGGT  
GCTTTGTCAAGCAACCGCTTAACGCCAGAGCAGGTCGTGCGCATAGCCAGCAATATCGGTGGTAAACAGGCGCTTGAACCGGTCC  
AAAGACTTCTGCCCGTCTTTGCCAAGCGCATGGCTGACACCTGACAGGTAGTCCGATTGCCATGACGGTGGGAAGCAG  
GCATTAGAAAACAGTTCAAAGATTATTACAGTCTGTGTGTCAGGCGCATGGGTTAAACCCAGAGCAGGTAGTTGCAATAGCATCCAA  
CATTTGGCGGAAAACAAGCGTTGGAAACGGTTCAGCGGTTATTGCCGTGTTTTGTGCCAGGCGCATGGTTTGCACCCGAGCAAGTGG  
TAGCCATAGCCTCAAATATAGGGGGTAAACAAGCTTTGGAGACAGTACAACGGCTGCTTCCAGTTTTATGTGTCAGGCCCATGGATTG  
ACGCCGTAACAAGTTGTCGCTATCGCAAGTAATGGGGGTGGTAAACAAGCGCTTGAACCGGTTCAACGCCTTCTGCTGTGCTTTG  
TCAGGCACATGGATTAAACCCGGAACAGGTTGTGCGGATAGCTTCAAACGGTGGTGGTGTGTCGGCACTGGAAAGCATTGTTGCAC  
AGCTGAGCCGTCCGGATCCGGCAAGtagcgggtgaaaacctgtatttccaatctggcagcggtcGGCAGCAGTACCAATGATCAT  
CTGGTTGCACTGGCATGTCTGGGTGGTCGCCCTGCCCTGGATGCAGTTAAAAAAGGCTGCGCCATGCACCGGCACTGATTAACAG  
TACCAATCGTCGTATTCCGGAACGTACCAGCCATCGTGTGTCAGATCATGCACAGGTTGTTTCGTGTTCTGGGTTTTTTTTCAGTGT  
ATAGCCATCCGGCACAGGCATTTGATGATGCAATGACCCAGTTTGGTATGAGCGATTATAAAGATGATGATGATAAATAA

### A6 – TEV recognition sites in the N- and C-termini (2577 bp)

ATGCATCACCATCATCACCATGTTGATCTGCGTACCCTGGGTTATAGCCAGCAGCAGCAAGAAAAATCAAACCGAAAAGTTTCGTAG  
CACCGTTGCACAGCATCATGAAGCACTGGTTGGTCATGGTTTTTACCCATGCACATATTGTTGCACTGAGCCAGCATCCGGCAGCAC  
TGGGCACCGTTGCAGTTAAATATCAGGATATGATTGCAGCACTGCCGGAAGCAACCCATGAAGCAATTGTTGGTGTGGTAAACAG  
TGGTCAGGTGCACGTGCCCTGGAAGCACTGCTGACCGTTGCCGGTGAAGTGCCTGGTCCGCTCTGCAGCTGGATACCGGTCAGCT  
GCTGAAAATTGCAAACGTGGTGGTGTACCCGAGTTGAAGCAGTTCATGCATGGCGTAATGCCTGACCGGTCACCGCTGAATG  
aaaacctgtacttccagttctGACACCGGAACAGGTTGTTGCAATTGCCAGCAATGGTGGTGGCAAACAGGCACTGGAAACCGTT  
CAGCGTCTGCTGCCGGTCTGTGTGTCAGGCACATGGTCTGACCCCTGAACAGGTGGTGGCCATTGCAAGCAATAATGGCGGTAACA  
AGCCCTGGAACAGCTGCAGCGCCTGTACCAGGTCGTGTCAGGCCCATGGCTTAACTCCGGAACAGGTTAGTGGCAATCGCATCAA  
ATGGCGGAGGTAACAGGCGCTTAGAAAACCGTACAGCGCTTACTGCCGGTGTATGCCAGGCGCACGGCCTGACGCCAGAACAGGTA  
GTGGCAATCGCCTCAAATAATGGTGGAAAACAGGCGTTAGAGACAGTCCAGCGCCTGCTGCCTGTATTATGTCAAGCCCATGGCCT  
GACCCAGAGCAAGTTGTTGCGATTGCAAGTAACATTGGGGGTAACAAGGCACCTTGAGACAGTTCAACGTTTACTGCTGTACTGT  
GCCAAGCTCACGGTCTGACTCCGGAACAAGTCTGCGGATTGCGAGTAATAACGGTGGCAAACAAGCATTAGAAAACGGTGAACGC  
CTGCTGCCAGTTCTTTGCCAGGCTCACGGTTAACCCTGAGCAGGTTGTAGCTATTGCGAGTCATGATGGTGGTAAAGCAGGCGTT  
GAAACTGTGCAAAGACTGCTGCCCGTGTGTGCCAAGCAGCATGGTTTAACCCAGAACAAAGTCTAGCAATCGCAAGCAATCATG  
GTGCAAGCAAGCGCTTGAACAGTACAGCGTTTATTACCGTACTTTGTGTCAGGCCACGGTCTTACACCAAGAACAGTTGTGGCC  
ATAGCCAGTAACAATGGCGGAAAGCAGGCTCTGGAACCGTACAACGTCTGTTACCTGTTCTGTGTCAAGCGCACGGATTAAACCC  
TGAACAAGTAGTTGCCATTGCGTCAAATATCGGAGGCAAGCAGGCGTTGGAGACAGTGCAGAGATTACTGCCAGTGTGTGTGTCAGG  
CTCATGGCCTTACACCCGAGCAGGTCGTGGCAATTGCATCTAATGGTGGCGGTAAGCAAGCTTTAGAGACTGTTTCAGAGACTGCTT  
CCTGTCTGTGCCAGGCACACGGAATTACGCCTGAGCAAGTGGTTGCAATCGCCTTAACATCGGTGGTAAAGCAAGCAAGTGGAAAC  
TGTCCAACGCTTACTTCCGGTCTTTGTCAAGCACAGGCTTAACGCCAGAGCAGGTCGTGCGCATAGCCAGCAATATCGGTGGTA  
AACAGGCGCTTGAACCGGTTCAAAGACTTCTGCCGGTCTTTGCCAAGCGCATGGGCTGACACCTGACACCTGAGCAGTGTGCGGATTGCC  
TCACATGACGGTGGGAAGCAGGCATTAGAAAACAGTTCAAAGATTATTACAGTCTGTGTGTCAGGCGCATGGGTTAACCAGAGCA  
GGTAGTTGCAATAGCATCCAACATTGGCGGAAAACAAGCGTTGGAAACGGTTCAGCGGTTATTGCCGTGTTTTGTGCCAGGCGCATG  
GTTTGCACCCGAGCAAGTGGTAGCCATAGCCTCAAATATAGGGGGTAAACAAGCTTTGGAGACAGTACAACGGCTGCTTCCAGTT  
TTATGTCAGGCCCATGGATTGACGCGTGAACAAGTTGTGCTATCGCAAGTAATGGGGGTGGTAAACAAGCGCTTGAACCGGTTCA  
ACGCCCTTCTGCTGTGCTTTGTGTCAGGCACATGGATTAAACCCGGAACAGGTTGTGCGGATAGCTTCAAACCGTGGTGGTGTGTCGG  
CACTGGAAAGCATTGTTGCACAGCTGAGCCGTCCGGATCCGGCAgaaaacctgtatttccaatctCTGCGCAGCAGTACCAATGAT

CATCTGGTTGCACTGGCATGTCTGGGTGGTCGCCCTGCCCTGGATGCAGTTAAAAAGGTCTGCCGCATGCACCGGCACTGATTAA  
ACGTACCAATCGTCTATTCCGGAACGTACCAGCCATCGTGTTCAGATCATGCACAGGTTGTTCTGGTTTTTTTTCAGT  
GTCATAGCCATCCGGCACAGGCATTTGATGATGCAATGACCCAGTTTGGTATGAGCGATTATAAAGATGATGATGATAAATA

## A7 – TEV recognition sites with flanking Gly-Ser-Gly residues in the N- and C-termini (2613 bp)

ATGCATCACCATCATCACCATGTTGATCTGCGTACCCTGGGTTATAGCCAGCAGCAGCAAGAAAAATCAAACCGAAAAGTTTCGTAG  
CACCGTTGCACAGCATCATGAAGCACTGGTTGGTCATGGTTTTACCCATGCACATATTGTTGCACTGAGCCAGCATCCGGCAGCAC  
TGGGCACCGTTGCAGTTAAATATCAGGATATGATTGCAGCACTGCCGGAAGCAACCCATGAAGCAATTGTTGGTGTGGTAAACAG  
TGGTCAGGTGCAGTGCCTGGAAGCACTGCTGACCGTTGCCGGTGAAGTGCCTGGTCCGCCCTGTCAGCTGGATACCGGTCAGCT  
GCTGAAAATTGCAAAACGTGGTGGTGTACCAGCAGTTGAAGCAGTTCATGCATGGCGTAATGCACTGACCGGTGCACCGCTGAATg  
gttctgggaaaacctgtacttccagctctggctcgggtCTGACACCGGAACAGGTTGTTGCAATTGCCAGCAATGGTGGTGGCAAA  
CAGGCACTGAAAACCGTTACGCGTCTGCTGCCGGTCTGTGTCCAGGCACATGGTCTGACCCCTGAACAGGTGGTGGCCATTGCAAG  
CAATAATGGCGGTAAACAAGCCCTGAAAACAGTGCAGCGCCTGTTACCGGTGCTGTGCCAGGCCCATGGCTTAACTCCGGAACAGG  
TGGTAGCGATCGCATCAAATGGCGGAGGTAACAGGCCCTTAGAAACCGTACAGCGCTTACTGCCGGTGTATGCCAGGCGCACGGC  
CTGACGCCAGAACAGGTAGTGGCAATCGCCTCAAATAATGGTGGAAAACAGGCGTTAGAGACAGTCCAGCGCTGCTGCCTGTATT  
ATGTCAGGCCATGGCTGACCCAGAGCAAGTTGTTGCGATTGCAAGTAACATTGGGGGTAAACAGGCACTTGAGACAGTTCAAC  
GTTTACTGCTGTACTGTGCCAAGCTCACGGTCTGACTCCGGAACAAGTCTGCGGATTGCGAGTAATAACGGTGGCAACAAGCA  
TTAGAAAACCGGTGCAACGCTGCTGCCAGTCTTTTCCAGGCTCACGGTTAAACCCCTGAGCAGGTTGTAGCTATTGCGAGTCATGA  
TGGTGGTAAGCAGGCGTTGAAAACCTGTGCAAGACTGCTGCCCGTGTGTGCAAGCACATGGTTTAAACCCAGAACAAAGTCGTAG  
CAATCGCAAGCAATCATGGTGGCAAGCAAGCGCTTGAACAGTACAGCGTTTATTACCGGTACTTGTGTCAGGCCACGGTCTTACA  
CCAGAACAGTTGTGGCCATAGCCAGTAACAATGGCGGAAAGCAGGCTCTGAAAACGGTACAACGCTCTGTTACCTGTTCTGTGTCA  
AGCGCACGGATTAACACCTGAACAAGTAGTTGCCATTGCGTCAAATATCGGAGGCAAGCAGGCCCTGGAGACAGTGCAGAGATTAC  
TGCCAGTGTGTGTGTCAGGCTCATGGCTTACACCCGAGCAGGTCGTGGCAATTGCATCTAATGGTGGCGGTAAGCAAGCTTTAGAG  
ACTGTTTACAGACTGCTTCTGTCTGTGCCAGGCACACGGACTTACCGCTGAGCAAGTGGTGCATTCGCCTCAACATCGGTGG  
TAAGCAAGCACTGAAAACCTGTCACGCTTACTTCCGGTGTCTTGTCAAGCACACGGCTTAAACGCCAGAGCAGGTCGTGCCATAG  
CCAGCAATATCGGTGGTAAACAGGCCCTTGAACCGTCCAAAGACTTCTGCCGGTCTTTGCCAAGCGCATGGGCTGACACCTGAG  
CAGGTAGTCGCGATTGCCATCAGCGTGGGAAGCAGGCATTAGAAAACAGTTCAAAGATTATTACCAGTCTGTGTGTCAGGCGCA  
TGGGTTAAACCCAGAGCAGGTAGTTGCAATAGCATCCAACATTGGCGGAAAACAAGCGTTGAAAACGGTTCAGCGGTTATTGCCCTG  
TTTTGTGCCAGGCGATGGTTTGCACCCGAGCAAGTGGTAGCCATAGCCTCAAATATAGGGGGTAAACAAGCTTTGGAGACAGTA  
CAACGGCTGCTTCCAGTTTATGTCCAGGCCATGGATTGACCGCTGAACAAGTTGTGCTATCGCAAGTAATGGGGGTGGTAAACA  
AGCGCTTGAACCGTTCAACGCTTCTGCCGTGTGCTTGTGTCAGGCACATGGATTAAACCCGAAACAGGTTGTCCGATGCTTCAA  
ACGGTGGTGGTCTCCGGCACTGGAAAGCATTGTTGCACAGCTGAGCCGTCCGGATCCGGCAggttagcgggtgaaaacctgtatttc  
caatctggcagcggcCTGGCAGCACTGACCAATGATCATCTGGTTGCACTGGCATGTCTGGTGGTGCCTGCCCTGGATGCAGT  
TAAAAAGGTCTGCCGCATGCACCGGCACTGATTAAACGTACCAATCGTCTGATTCCGGAACGTACCAGCCATCGTGTGCAGATC  
ATGCACAGGTTGTTCTGTGTTCTGGTTTTTTTTTTCAGTGTATAGCCATCCGGCACAGGCATTTGATGATGCAATGACCCAGTTTGGT  
ATGAGCGATTATAAAGATGATGATGATAAATA

## TlysA and its variants

### B0 – TlysA, no TEV sites (2943 bp)

ATGCATCACCATCATCACCATGTTGATCTGCGTACCCTGGGTTATAGCCAGCAGCAGCAAGAAAAATCAAACCGAAAAGTTTCGTAG  
CACCGTTGCACAGCATCATGAAGCACTGGTTGGTCATGGTTTTACCCATGCACATATTGTTGCACTGAGCCAGCATCCGGCAGCAC  
TGGGCACCGTTGCAGTTAAATATCAGGATATGATTGCAGCACTGCCGGAAGCAACCCATGAAGCAATTGTTGGTGTGGTAAACAG  
TGGTCAGGTGCAGTGCCTGGAAGCACTGCTGACCGTTGCCGGTGAAGTGCCTGGTCCGCCCTGTCAGCTGGATACCGGTCAGCT  
GCTGAAAATTGCAAAACGTGGTGGTGTACCAGCAGTTGAAGCAGTTCATGCATGGCGTAATGCACTGACCGGTGCACCGCTGAATC  
TGACACCGGAACAGGTTGTTGCAATTGCCAGCCATGATGGTGGCAAAACAGGCCTGAAAACCGTTACAGCTGCTGTGCCGGTCTG  
TGTCAGGCACATGGTCTGACCCCTGAACAGGTGGTGGCCATTGCAAGCAATGGTGGCGGTAACAAGCCCTGAAAACAGTGCAGCG  
CCTGTTACCGGTGCTGTGCCAGGCCATGGCTTAACTCCGGAACAGGTGGTAGCGATCGCATCAAATGGCGGAGGTAACAAGGCCCT  
TAGAAAACCGTACAGCGCTTACTGCCGGTGTATGCCAGGCGCACGGCCTGACGCCAGAACAGGTAAGTGGCAATCGCCTCAAATGGC  
GGTGGAAAACAGGCGTTAGAGACAGTCCAGCGCCTGCTGCCTGTATTATGTCAGCCATGGCCTGACCCAGAGCAAGTTGTTGC  
GATTGCAAGTATGGTGGGGTAAACAGGCACCTGAGACAGTTTACAGCTTTACTGCTGTACTGTGCAAGCTTACCCAGTGCAGGCTGACAC  
CGGAACAAGTCTGCGGATTGCGAGTAACGGTGGTGGCAAAACAAGCATTAGAAAACGGTGAACGCTGCTGCCAGTTCTTTGCCAG  
GCTCACGGTTTAAACCCCTGAGCAGGTTGTAGCTATTGCGAGTAACATTGGTGGTAAAGCAGGCGTTGAAAACCTGTGCAAGACTGCT  
GCCGTGTTGTGCCAAGCACATGGTTTAAACCCAGAACAGTCTGATCAATCGCAAGCAATGGGGGTGGCAAGCAAGCGCTTAAA  
CAGTACAGCGTTTTATTACCGGTACTTTGTGACGGCCACGGTCTTACACCAGAACAAGTTGTGGCCATAGCCAGTAAACAATGGCGGA  
AAGCAGGCTCTGAAAACGGTACAACGCTGTTTACCTGTTCTGTGTCAAGCGCACGGATTAAACCTGAACAAGTAGTTGCCATTGC  
GTCAAAATATCGGAGGCAAGCAGGCCCTGGAGACAGTGCAGAGATTACTGCCAGTGTGTGTGTCAGGCTCATGGCCTTACACCCGAGC  
AGGTCGTGGCAATTGCATCTAATGGTGGCGGTAAGCAAGCTTTAGAGACTGTTTACAGAGACTGCTTCTGTCTGTGCCAGGCACAC  
GGACTTACGCTGAGCAAGTGGTTGCAATCGCCTCTAATCATGGTGGTAAAGCAAGCAAGCAAGTGTGCAACGCTTACTTCCGGT  
GCTTTGTCAAGCACACGGCTTAAACGCCAGAGCAGGTCGTGCCATAGCCAGCAACGGTGGTGGTAAACAGGCCCTTGAACGGTCC  
AAAGACTTCTGCCGGTCTTTGCCAAGCGCATGGGCTGACACCTGAGCAGGTAGTCGCGATTGCCTCAAATAACGGTGGGAAGCAG



GCATTAGAAACAGTTCAAAGATTATTACCAGTCCTGTGTCAGGCGCATGGGTTAACCCAGAGCAGGTAGTTGCAATAGCATCCAA  
TCATGGCGGAAAACAGCGTTGGAAACGGTTACGCGGTTATTGCCGTGTTTTGTGCCAGGCGCATGGTTTGACACCCGAGCAAGTTGG  
TAGCCATAGCCTCACATGATGGGGGTAAACAAGCTTTGGAGACAGTACAACGGCTGCTTCCAGTTTTATGTCAGGCCCATGGATTG  
ACGCTGAACAAGTTGTCGCTATCGCAAGTAATAATGGTGGTAAACAAGCGCTTGAACCGTTCAACGCCTTCTGCCTGTGCTTTG  
TCAGGCACATGGACTTACGCCTGAGCAAGTGGTTGCAATCGCCTTAACCGTGGTGGTAAGCAAGCACTGGAAACTGCACAACGCCT  
TACTTCCGGTGTCTTGTCAAGCACACGGCCTGACACCGGAACAGGTTGTTGCAATTGCCAGCAATATAGGTGGCAAACAGGCACTG  
GAAACCGTTACGCGTCTGCTGCCGGTCTGTGTGTCAGGCACATGGTCTGACACCTGAGCAGGTAGTCGCGATTGCCCAACATCGG  
TGGGAAGCAGGCATTAGAAACAGTTCAAAGATTATTACCAGTCCTGTGTCAGGCGCATGGGCTGACTCCGGAACAAGTCGTCGCGA  
TTGCGAGTAATGGTGGTGGCAAACAAGCATTAGAAACGGTGAACGCCTGCTGCCAGTTCTTTGCCAGGCTCACGGTTAACACCC  
GAACAGGTTGTCCGATAGCTTACATGATGGTGGTTCGTCGGCAGCTGGAAAGCATTGTTGCACAGCTGAGCCGTCCGGATCCGGC  
ACTGGCAGCACTGACCAATGATCATCTGGTGCACATGCTGGTGGTGGTGGTGGTGGTGGTGGTGGTGGTGGTGGTGGTGGTGGTGG  
CGATGCACCGGCCTGATTAACCTGACCAATCGTTCGTATTCCGGAACGTACCAGCCATCGTGTGTCAGATCATGCACAGGTTGTT  
CGTGTCTGGGTTTTTTTTCAGTGTATAGCCATCCGGCACAGGCATTTGATGATGCAATGACCCAGTTTGGTATGAGCGATTATAA  
AGATGATGATGATAAATAA

### B3 – TEV recognition sites with flanking Gly-Ser-Gly residues in the N-terminus (2982 bp)

ATGCATCACCATCATCACCATGTTGATCTGCGTACCCTGGGTTATAGCCAGCAGCAGCAAGAAAAAATCAAACCGAAAAGTTTCGTAG  
CACCGTTGCACAGCATCATGAAGCACTGGTTGGTTCATGGTTTTACCCATGCACATATTGTTGCACTGAGCCAGCATCCGGCAGCAC  
TGGGCACCGTTGCAGTTAAATATCAGGATATGATTGCAGCACTGCCGGAAGCAACCCATGAAGCAATTGTTGGTGTGGTAAACAG  
TGGTACAGGTGCACGTGCCCTGGAAGCACTGCTGACCGTTGCCGGTGAACCTGCGTGGTCCGCTCTGCAGCTGGATACCGGTCAGCT  
GCTGAAAATTGCAAAACGTGGTGGTGTACCCGAGTTGAAGCAGTTTCATGCATGGCGTAATGCACCTGACCGGTGCACCGCTGAATg  
gttctggcgaaaacctgtacttccagttctggctcgggtCTGACACCGGAACAGGTTGTTGCAATTGCCAGCCATGATGGTGGCAAA  
CAGGCACTGGAACCGTTACGCGTCTGCTGCCGGTCTGTGTGTCAGGCACATGGTCTGACCCCTGAACAGGTGGTGGCCATTGCAAG  
CAATGGTGGCGGTAAACAAGCCCTGGAAACAGTGCAGCGCTGTTACCAGGTGCTGTCAGGCGCCATGGCTTAACTCCGGAACAGG  
TGGTAGCGATCGCATCAAATGGCGGAGGTAAACAGGCTTAGAAACCGTACAGCGCTTACTGCCGGTGTATGCCAGGCGCACGGC  
CTGACGCCAGAACAGGTAGTGGCAATCGCCTCAAATGGCGGTGGAAACAGGCGTTAGAGACAGTCCAGCGCTGCTGCCTGTATT  
ATGTCAGCCCATGGCTGACCCAGAGCAAGTTGTTGCGATTGCAAGTAATGGTGGGGGTAAACAGGCACTTGCAGAGTTCAAC  
GTTTACTCGCTGTACTGTGCCAAGCTCACGGTCTGACTCCGGAACAAGTCTGCGGATTGCGAGTAACCGTGGTGGCAAACAAGCA  
TTAGAAACGGTGCACCGCTGCTGCCAGTTCTTGGCAGGCTCACGGTTAAACCCCTGAGCAGGTTGTAGCTATTGGCAGTAACAT  
TGGTGGTAAGCAGGCGTTGGAACCTGTGCAAAGACTGCTGCCCGTGTGTGTCGAAGCAGCATGGTCTTAAACCCAGAACAGTCTAG  
CAATCGCAAGCAATGGGGGTGGCAAGCAAGCGCTTGAACAGTACAGCGTTTTATTACCAGTACTTGTGTCAGGCCACGGTCTTACA  
CCAGAACAAGTTGTGGCCATAGCCAGTAACAATGGCGGAAGCAGGCTCTGGAACCGTACAACGCTCTGTTACCTGTTCTGTGTCA  
AGCGCACGGATTAACACCTGAACAAGTAGTTGCCATTGCGTCAAATATCGGAGGCAAGCAGGCTTGGAGACAGTGCAGAGATTAC  
TGCCAGTGTGTTGTCAGGCTCATGGCTTACACCCGAGCAGGTCGTGGCAATTGCATCTAATGGTGGCGGTAAGCAAGCTTTAGAG  
ACTGTTACAGAGACTGCTTCTGTCTGTGCCAGGCACACGGACTTACGCCTGAGCAAGTGGTGGCAATCGCCTTAATCATGGTGG  
TAAGCAAGCACTGGAACCTGTCCAACGCTTACTTCCGGTCTTGTGCAAGCAGCAGGCTTAAACGCCAGAGCAGGTCGTGCCCATAG  
CCAGCAACCGTGGTGGTAAACAGGCGCTTGAACCGTCCAAGACTTCTGCCGGTCTTTGCCAAGCGCATGGGCTGACACCTGAG  
CAGGTAGTCGCGATTGCCCTCAAATAACCGTGGGAAGCAGGCATTAGAAACAGTTCAAAGATTATTACCAGTCTGTGTGTCAGGCGCA  
TGGGTTAACCCAGAGCAGGTAGTTGCAATAGCATCCAATCATGGCGGAAACAAGCGTTGGAACCGTTACGCGGTTATTGCCCTG  
TTTTGTGCCAGGCGCATGGTTTGACACCCGAGCAAGTGGTAGCCATAGCCTCACATGATGGGGGTAAACAAGCTTTGGAGACAGTA  
CAACGGCTGCTTCCAGTTTTATGTCAGGCCCATGGATTGACCGCTGAACAAGTTGTCGCTATCGCAAGTAATAATGGTGGTAAACA  
AGCGCTTGAACCGTTCAACGCCTTCTGCCTGTGCTTTGTGTCAGGCACATGGACTTACGCTGAGCAAGTGGTGGCAATCGCCTTA  
ACGGTGGTGGTAAGCAAGCACTGGAACCTGTCCAACGCTTACTTCCGGTCTTTGTGTCAGGCACATGGACTTACGCTGAGCAAGTGGTGGCAATCGCCTTA  
GTTGCAATTGCCAGCAATATAGGTGGCAAACAGGCACTGGAACCGTTGCGGTGCTTTGTCAGCAGTCTGCTGCCGGTCTGTGTCAGGCACATGGTGT  
GACACCTGAGCAGGTAGTCGCGATTGCCCTCAAACATCGGTGGGAAGCAGGCATTAGAAACAGTTCAAAGATTATTACCAGTCTGT  
GTCAGGCGCATGGGCTGACTCCGGAACAAGTCTGCGGATTGCGAGTAATGGTGGTGGCAAACAAGCATTAGAAACCGTGCACCGC  
CTGCTGCCAGTTCTTTGCCAGGCTCACGGTTAACACCCGAACAGGTTGTGCGGATAGCTTACATGATGGTGGTGGTCCGGCAGCT  
GGAAAGCATTGTTGCACAGCTGAGCCGTCCGGATCCGGCACTGGCAGCACTGACCAATGATCATCTGGTGGCACTGGCATGTCTGG  
GTGGTCCGCTGCCCTGGATGCAGTTAAAAAAGTCTGCCAGTGCACCGGCACTGATTAACCTGACCAATCGTCTGATTTCCGGAA  
CGTACCAGCCATCGTGTGAGATCATGCACAGGTTGTTGCTGTTCTGGGTTTTTTTTCAGTGTCTAGCCATCCGGCACAGGCATT  
TGATGATGCAATGACCCAGTTTGGTATGAGCGATTATAAAGATGATGATGATAAATAA

### B7 – TEV recognition sites with flanking Gly-Ser-Gly residues in the N- and C-termini (3021 bp)

ATGCATCACCATCATCACCATGTTGATCTGCGTACCCTGGGTTATAGCCAGCAGCAGCAAGAAAAAATCAAACCGAAAAGTTTCGTAG  
CACCGTTGCACAGCATCATGAAGCACTGGTTGGTTCATGGTTTTACCCATGCACATATTGTTGCACTGAGCCAGCATCCGGCAGCAC  
TGGGCACCGTTGCAGTTAAATATCAGGATATGATTGCAGCACTGCCGGAAGCAACCCATGAAGCAATTGTTGGTGTGGTAAACAG  
TGGTACAGGTGCACGTGCCCTGGAAGCACTGCTGACCGTTGCCGGTGAACCTGCGTGGTCCGCTCTGCAGCTGGATACCGGTCAGCT  
GCTGAAAATTGCAAAACGTGGTGGTGTACCCGAGTTGAAGCAGTTTCATGCATGGCGTAATGCACCTGACCGGTGCACCGCTGAATg  
gttctggcgaaaacctgtacttccagttctggctcgggtCTGACACCGGAACAGGTTGTTGCAATTGCCAGCCATGATGGTGGCAAA  
CAGGCACTGGAACCGTTACGCGTCTGCTGCCGGTCTGTGTGTCAGGCACATGGTCTGACCCCTGAACAGGTGGTGGCCATTGCAAG  
CAATGGTGGCGGTAAACAAGCCCTGGAAACAGTGCAGCGCTGTTACCAGGTGCTGTCAGGCGCCATGGCTTAACTCCGGAACAGG  
TGGTAGCGATCGCATCAAATGGCGGAGGTAAACAGGCTTAGAAACCGTACAGCGCTTACTGCCGGTGTATGCCAGGCGCACGGC  
CTGACGCCAGAACAGGTAGTGGCAATCGCCTCAAATGGCGGTGGAAACAGGCGTTAGAGACAGTCCAGCGCTGCTGCCTGTATT  
ATGTCAGCCCATGGCTGACCCAGAGCAAGTTGTTGCGATTGCAAGTAATGGTGGGGGTAAACAGGCACTTGCAGAGTTCAAC  
GTTTACTCGCTGTACTGTGCCAAGCTCACGGTCTGACTCCGGAACAAGTCTGCGGATTGCGAGTAACCGTGGTGGCAAACAAGCA  
TTAGAAACGGTGCACCGCTGCTGCCAGTTCTTGGCAGGCTCACGGTTAAACCCCTGAGCAGGTTGTAGCTATTGGCAGTAACAT  
TGGTGGTAAGCAGGCGTTGGAACCTGTGCAAAGACTGCTGCCCGTGTGTGTCGAAGCAGCATGGTCTTAAACCCAGAACAGTCTAG  
CAATCGCAAGCAATGGGGGTGGCAAGCAAGCGCTTGAACAGTACAGCGTTTTATTACCAGTACTTGTGTCAGGCCACGGTCTTACA  
CCAGAACAAGTTGTGGCCATAGCCAGTAACAATGGCGGAAGCAGGCTCTGGAACCGTACAACGCTCTGTTACCTGTTCTGTGTCA  
AGCGCACGGATTAACACCTGAACAAGTAGTTGCCATTGCGTCAAATATCGGAGGCAAGCAGGCTTGGAGACAGTGCAGAGATTAC  
TGCCAGTGTGTTGTCAGGCTCATGGCTTACACCCGAGCAGGTCGTGGCAATTGCATCTAATGGTGGCGGTAAGCAAGCTTTAGAG  
ACTGTTACAGAGACTGCTTCTGTCTGTGCCAGGCACACGGACTTACGCCTGAGCAAGTGGTGGCAATCGCCTTAATCATGGTGG  
TAAGCAAGCACTGGAACCTGTCCAACGCTTACTTCCGGTCTTGTGCAAGCAGCAGGCTTAAACGCCAGAGCAGGTCGTGCCCATAG  
CCAGCAACCGTGGTGGTAAACAGGCGCTTGAACCGTCCAAGACTTCTGCCGGTCTTTGCCAAGCGCATGGGCTGACACCTGAG  
CAGGTAGTCGCGATTGCCCTCAAATAACCGTGGGAAGCAGGCATTAGAAACAGTTCAAAGATTATTACCAGTCTGTGTGTCAGGCGCA  
TGGGTTAACCCAGAGCAGGTAGTTGCAATAGCATCCAATCATGGCGGAAACAAGCGTTGGAACCGTTACGCGGTTATTGCCCTG  
TTTTGTGCCAGGCGCATGGTTTGACACCCGAGCAAGTGGTAGCCATAGCCTCACATGATGGGGGTAAACAAGCTTTGGAGACAGTA  
CAACGGCTGCTTCCAGTTTTATGTCAGGCCCATGGATTGACCGCTGAACAAGTTGTCGCTATCGCAAGTAATAATGGTGGTAAACA  
AGCGCTTGAACCGTTCAACGCCTTCTGCCTGTGCTTTGTGTCAGGCACATGGACTTACGCTGAGCAAGTGGTGGCAATCGCCTTA  
ACGGTGGTGGTAAGCAAGCACTGGAACCTGTCCAACGCTTACTTCCGGTCTTTGTGTCAGGCACATGGACTTACGCTGAGCAAGTGGTGGCAATCGCCTTA  
GTTGCAATTGCCAGCAATATAGGTGGCAAACAGGCACTGGAACCGTTGCGGTGCTTTGTCAGCAGTCTGCTGCCGGTCTGTGTCAGGCACATGGTGT  
GACACCTGAGCAGGTAGTCGCGATTGCCCTCAAACATCGGTGGGAAGCAGGCATTAGAAACAGTTCAAAGATTATTACCAGTCTGT  
GTCAGGCGCATGGGCTGACTCCGGAACAAGTCTGCGGATTGCGAGTAATGGTGGTGGCAAACAAGCATTAGAAACCGTGCACCGC  
CTGCTGCCAGTTCTTTGCCAGGCTCACGGTTAACACCCGAACAGGTTGTGCGGATAGCTTACATGATGGTGGTGGTCCGGCAGCT  
GGAAAGCATTGTTGCACAGCTGAGCCGTCCGGATCCGGCACTGGCAGCACTGACCAATGATCATCTGGTGGCACTGGCATGTCTGG  
GTGGTCCGCTGCCCTGGATGCAGTTAAAAAAGTCTGCCAGTGCACCGGCACTGATTAACCTGACCAATCGTCTGATTTCCGGAA  
CGTACCAGCCATCGTGTGAGATCATGCACAGGTTGTTGCTGTTCTGGGTTTTTTTTCAGTGTCTAGCCATCCGGCACAGGCATT  
TGATGATGCAATGACCCAGTTTGGTATGAGCGATTATAAAGATGATGATGATAAATAA

CAATGGTGGCGGTAAACAAGCCCTGAAACAGTGCAGCGCCTGTTACCGGTGCTGTGCCAGGCCCATGGCTTAACTCCGGAACAGG  
TGGTAGCGATCGCATCAAATGGCGGAGGTAAACAGGCCTTAGAAACCGGTACAGCGCTTACTGCCGGTGTATGCCAGGCGCACGGC  
CTGACGCCAGAACAGGTAGTGGCAATCGCCTCAAATGGCGGTGAAAAACAGGCGTTAGAGACAGTCCAGCGCCTGCTGCCTGTATT  
ATGTCAAGCCCATGGCCTGACCCAGAGCAAGTTGTTGCGATTGCAAGTAATGGTGGGGTAAACAGGCACTTGAGACAGTTCAAC  
GTTTACTGCCTGTACTGTGCCAAGCTCACGGTCTGACTCCGGAACAAGTCGTCGCGATTGCGAGTAACGGTGGTGGCAACAAGCA  
TTAGAAACGGTGCACGCCTGCTGCCAGTTCTTTGCCAGGCTCACGGTTAAACCCCTGAGCAGGTTGTAGCTATTGCGAGTAACAT  
TGGTGGTAAAGCAGGCGTTGAAACTGTGCAAAGACTGCTGCCCGTGTGTGCCAAGCACATGGTTAAACCCAGAACAGTCGTAG  
CAATCGCAAGCAATGGGGTGGCAAGCAAGCGCTTAAACAGTACAGCGTTTATTACCGGTACTTTGTCAGGCCACGGTCTTACA  
CCAGAACAGTTGTGGCCATAGCCAGTAACAATGGCGGAAAGCAGGCTCTGAAACCGGTACAACGCTCTGTTACCTGTTCTGTGTCA  
AGCGCACGGATTAACACCTGAACAAGTAGTTGCCATTGCGTCAAATATCGGAGGCAAGCAGGCCCTGGAGACAGTGCAGAGATTAC  
TGCCAGTGTGTGTCAGGCTTACGGCTTACACCCGAGCAGGTCGTGGCAATGTCATCTAATGGTGGCGGTAAAGCAAGCTTTAGAG  
ACTGTTTCAGAGACTGCTTCCGTGCTGTGCCAGGCACAGGACTTACGCCTGAGCAAGTGGTTGCAATCGCCTCTAATCATGGTGG  
TAAGCAAGCACTGGAACTGTCCAACGCTTACTTCCGGTGTGTTGTCAAGCACACGGCTTAAACGCCAGAGCAGGTCGTGCCATAG  
CCAGCAACGGTGGTGGTAAACAGGCCCTTGAACCGTCCAAAGACTTCTGCCGGTCTTTGCCAAGCGCATGGGCTGACACCTGAG  
CAGGTAGTCGCGATTGCCCTCAAATAACGGTGGGAAGCAGGCATTAGAAACAGTTCAAAGATTATTACCAGTCCGTGTGTCAGGCCGA  
TGGGTTAAACCCAGAGCAGGTAGTTGCAATAGCATCCAATCATGGCGGAAACAAGCGTTGAAACCGGTTACGCGGTTATTGCCCTG  
TTTTGTGCCAGGCGATGGTTTGACACCCGAGCAAGTGGTAGCCATAGCCTCACATGATGGGGTAAACAAGCTTTGGAGACAGTA  
CAACGGCTGTTCAGTTTTATGTGTCAGGCCATGGATTGACGCCTGAACAAGTTGTCGCTATCGCAAGTAATAATGGTGGTAAACA  
AGCGCTTGAACCGTTCAACGCCTTCTGCCTGTGCTTTGTGTCAGGCACATGGACTTACGCCTGAGCAAGTGGTTGCAATCGCCTCTA  
ACGGTGGTGGTAAAGCAAGCACTGGAACTGTCCAACGCTTACTTCCGGTGTGTTGTCAAGCACACGGCTGACACCCGAAACAGGTT  
GTTGCAATTGCCAGCAATATAGGTGGCAAACAGGCACTGAAACCGTTTACGCGTCTGCTGCCGGTCTGTGTGTCAGGCACATGGTCT  
GACACCTGAGCAGGTAGTCGCGATTGCCTCAAACATCGGTGGGAAGCAGGCATTAGAAACAGTTCAAAGATTATTACCAGTCCGTG  
GTCAGGCGCATGGGCTGACTCCGGAACAAGTCGTGCGGATTGCGAGTAATGGTGGTGGCAACAAGCATTAGAAACCGGTGCAACGC  
CTGCTGCCAGTTCTTTGCCAGGCTCACGGTTAAACACCCGAACAGGTTGTCGCGATAGCTTACATGATGGTGGTCTGTCGCGCAT  
GGAAAGCATTGTTGCACAGCTGAGCCGTCCGGATCCGGCAGgttagcggtgaaaacctgtatttccaatctggcagcggcCTGGCAG  
CACTGACCAATGATCATCTGGTGTCACTGGCATGTCTGGGTGGTCCGCTGCCCTGGATGCAGTAAAAAAGGTTGCCCGCATGCA  
CCGGCACTGATTAACGTACCAATCGTGTATCCGGAACGTACCAGCCATCGTGTGAGATCATGCACAGGTTGTTGTTGTTCT  
GGGTTTTTTTTCAGTGTATAGCCATCCGGCACAGGCATTTGATGATGCAATGACCCAGTTTGGTATGAGCGATTATAAAGATGATG  
ATGATAAATAA

## TsucA

### **C3 – TEV recognition sites with flanking Gly-Ser-Gly residues in the N-terminus ( bp)**

ATGCATCACCATCATCACCATGTTGATCTGCGTACCCTGGGTTATAGCCAGCAGCAGCAAGAAAAATCAAACCGAAAGTTTCGTAG  
CACCGTTGCACAGCATCATGAAGCACTGGTGGTTCATGGTTTTACCCATGCACATATTGTTGCACTGAGCCAGCATCCGGCAGCAC  
TGGGCACCGTTGCAGTTAAATATCAGGATATGATTGCAGCAGTCCGGAAGCAACCCATGAAGCAATTGTTGGTGTGGTAAACAG  
TGGTCAAGTGCAGTGCCTGGAAGCACTGCTGACCGTTGCCGGTGAAGTCCGTCGTTCCGCTCTGCAGTGGATACCGGTCAGCT  
GCTGAAAATTGAAAACAGTGGTGGTGTACCAGTGTGAAGCAGTTCATGCATGGCGTAATGCACTGACCGGTCACCGCTGAATG  
**gttctggcgaaaacctgtacttccagtctggctcgggtCTGACACCCGGAACAGGTTGGTGGCTATTGCCAGCAATAATGGTGGCAAA**  
**CAGGCACTGAAACCGTTACGCGTCTGCTGCCGGTGTGTGCCAGGCACATGGTTAAACCCCGGCGCAGGTTGGTGGCATTGCAAG**  
**CAATATTGGCGGTAAACAAGCCCTGAAACAGTGCAGCGCCTGTTACCTGTCTTATGCCAAGATCATGGCTTGACCCCTGACCAAG**  
**TGGTCCGCATCGCATCACATGATGGAGGTAAACAGGCCCTTAGAAACCGTACAGCGCTTACTGCCGGTACTGTGCCAGGACCACGGC**  
**CTGACGCCAGAGCAGGTGGTAGCGATCGCCTCAAATATTGGTGGAAAAACAGGCGTTAGAGACAGTCCAGCGCCTGCTGCCAGTCTCT**  
**TTGCCAAGCCCACGGCTGACTCCGGCACAGGTGGCAAGTTGCAAGTTCATGATGGGGTAAACAGGCACTGAGACAGTTGACAGTTCAAC**  
**GTTTACTGCCGGTGTGTGCCAGGCTCATGGTCTGACGCCCGATCAAGTGGTTGCAATTGCGAGTAATGGCGGTGGCAACAAGCA**  
**TTAGAAACGGTGCACGCCTGCTGCCCGTCTTTGCCAGGACCATGGTTAAACCCCGGATCAGGTTGTAGCAATTGCGAGTAATAT**  
**TGGTGGTAAAGCAGGCGTTGAAACTGTGCAAAGACTGCTGCCCGTGTGTGCCAAGCACACGGTTAAACGCCAGAACAGGTTGTGG**  
**CCATCGCAAGCAACAATCGGTGGCAAGCAAGCGCTTAAACAGTACAGCGTTTATTACCTGTGCTCTGTGTCAGGACCACGGTCTTACC**  
**CCGGCCCAAGTTGTTGCCATAGCCAGTAATCATGGCGGAAAGCAGGCTCTGAAACCGGTACAACGCTCTGTTACCGGTACTGTGTCA**  
**GGATCATGGATTGACCCCGGCACAGGTTGTGCGGATTGCGTCAAATATCGGAGGCAAGCAGGCCCTGGAGACAGTGCAGAGATTAC**  
**TGCCAGTTTTATGTCAAGCACATGGCTGACACCCGGAACAGGTTGTGGCGATTGCATCTCATGATGGCGGTAAAGCAAGCTTTAGAG**  
**ACTGTTTCAGAGACTGCTTCCGGTGTGTGTCAGGACCACGGACTTACGCCTGACCAAGTTGTTGCTATCGCCTCTAACATCGGTGG**  
**TAAGCAAGCACTGGAACTGTCCAACGCTTACTTCCAGTCTTTGTCAAGACCACGGCTTAAACGCCGAGCAGGTCGTAGCGATAG**  
**CCAGCAATAATGGTGGTAAACAGGCCCTTGAACCGTCCAAAGACTTCTGCCTGTCTGTGTCAAGACCATGGGCTGACACCTGCC**  
**CAGGTAGTGGCCATTGCCCTCAAATGGCGGTGGGAAGCAGGCATTAGAAACAGTTCAAAGATTATTACCAGTCTTGTGTGTCAGGCCGA**  
**TGGGTTGACACCCGAACAAGTCGTGGCGATAGCTTCAAACGGTGGTGGTCTGCCGCACTGGAAAGCATTGTTGCACAGCTGAGCC**  
**GTCCGGATCCGGCACTGGCAGCACTGACCAATGATCATCTGGTGGTGGTGGTGGTGGTGGTGGTGGTGGTGGTGGTGGTGGTGGTGGT**  
**AAAAAAGGTTCTGCCGATGCACCCGCACTGATTAACAGTACCAATCGTGTATCCGGAACGTACCAGCCATCGTGTGTCAGATCA**  
**TGCACAGGTTGTTGTTGTTGTTGTTGTTGTTGTTGTTGTTGTTGTTGTTGTTGTTGTTGTTGTTGTTGTTGTTGTTGTTGTTGTTGTTGTT**  
**TGAGCGATTATAAAGATGATGATGATAAATAA**

## Constitutive promoters driving A0-7, B0, 3, 7, and C3 TALEs

**P<sup>1</sup>** - CTGATGGCTAGCTCAGTCCTAGGGATTATGCTAGC  
**P<sup>2</sup>** - TTGACAGCTAGCTCAGTCCTAGGGATTGTGCTAGC  
**P<sup>3</sup>** - TTTACGGCTAGCTCAGTCCTAGGTACTATGCTAGC  
**P<sup>4</sup>** - TTTACGGCTAGCTCAGTCCTAGGTATAGTGCTAGC  
**P<sup>5</sup>** - TTGACAGCTAGCTCAGTCCTAGGTACTGTGCTAGC

## TEV protease and its variants

### **T – active *tev* protease (750 bp)**

ATGCATCATCATCATCATCATCATGGAGAAAGCTTGTTAAGGGGCCGCGTGATTACAACCCGATATCGAGCACCATTGTGCATTT  
GACGAATGAATCTGATGGGCACACAACATCGTTGTATGGTATTGGATTTGGTCCCTTCATCATTACAACAAGCACTTGTTTAGAA  
GAAATAATGGAACACTGTTGGTCCAATCACTACATGGTGTATTCAAGGTCAAGAACCACGACTTTGCAACAACACCTCATTGAT  
GGGAGGGACATGATAATTATTTCGCATGCCTAAGGATTTCCACCATTTCCTCAAAAAGCTGAAATTTAGAGAGCCACAAAGGGAAGA  
GCGCATATGTCTTGTGACAACCAACTTCCAAACTAAGAGCATGTCTAGCATGGTGTGACACACTAGTTGCACATTCCCTTCATCTG  
ATGGCATATTCTGGAAGCATTGGATTCAAACCAAGGATGGGCAGTGTGGCAGTCCATTAGTATCAACTAGAGATGGGTTTCATTGTT  
GGTATACACTCAGCATCGAATTTCCAAACACAAACAATTATTTACAAGCGTGCCGAAAAAATTCATGGAATTTGTTGACAAATCA  
GGAGGCGCAGCAGTGGGTTAGTGGTTGGCGATTAAATGCTGACTCAGTATTGTGGGGGGGCCATAAAGTTTTTCATGGTGAAACCTG  
AAGAGCCTTTTTCAGCCAGTTAAGGAAGCGACTCAACTCATGAATCGTCGTCGCCGTCGCTAA

### **Ti – catalytically inactive *tev* protease (C151A) (750 bp)**

ATGCATCATCATCATCATCATCATGGAGAAAGCTTGTTAAGGGGCCGCGTGATTACAACCCGATATCGAGCACCATTGTGCATTT  
GACGAATGAATCTGATGGGCACACAACATCGTTGTATGGTATTGGATTTGGTCCCTTCATCATTACAACAAGCACTTGTTTAGAA  
GAAATAATGGAACACTGTTGGTCCAATCACTACATGGTGTATTCAAGGTCAAGAACCACGACTTTGCAACAACACCTCATTGAT  
GGGAGGGACATGATAATTATTTCGCATGCCTAAGGATTTCCACCATTTCCTCAAAAAGCTGAAATTTAGAGAGCCACAAAGGGAAGA  
GCGCATATGTCTTGTGACAACCAACTTCCAAACTAAGAGCATGTCTAGCATGGTGTGACACACTAGTTGCACATTCCCTTCATCTG  
ATGGCATATTCTGGAAGCATTGGATTCAAACCAAGGATGGGCAGGCGGCGAGTCCATTAGTATCAACTAGAGATGGGTTTCATTGTT  
GGTATACACTCAGCATCGAATTTCCAAACACAAACAATTATTTACAAGCGTGCCGAAAAAATTCATGGAATTTGTTGACAAATCA  
GGAGGCGCAGCAGTGGGTTAGTGGTTGGCGATTAAATGCTGACTCAGTATTGTGGGGGGGCCATAAAGTTTTTCATGGTGAAACCTG  
AAGAGCCTTTTTCAGCCAGTTAAGGAAGCGACTCAACTCATGAATCGTCGTCGCCGTCGCTAA

### **TiKm – catalytically inactive *tev* protease with higher $K_m$ relative to wild type (C151A, F217K) (750 bp)**

ATGCATCATCATCATCATCATCATGGAGAAAGCTTGTTAAGGGGCCGCGTGATTACAACCCGATATCGAGCACCATTGTGCATTT  
GACGAATGAATCTGATGGGCACACAACATCGTTGTATGGTATTGGATTTGGTCCCTTCATCATTACAACAAGCACTTGTTTAGAA  
GAAATAATGGAACACTGTTGGTCCAATCACTACATGGTGTATTCAAGGTCAAGAACCACGACTTTGCAACAACACCTCATTGAT  
GGGAGGGACATGATAATTATTTCGCATGCCTAAGGATTTCCACCATTTCCTCAAAAAGCTGAAATTTAGAGAGCCACAAAGGGAAGA  
GCGCATATGTCTTGTGACAACCAACTTCCAAACTAAGAGCATGTCTAGCATGGTGTGACACACTAGTTGCACATTCCCTTCATCTG  
ATGGCATATTCTGGAAGCATTGGATTCAAACCAAGGATGGGCAGGCGGCGAGTCCATTAGTATCAACTAGAGATGGGTTTCATTGTT  
GGTATACACTCAGCATCGAATTTCCAAACACAAACAATTATTTACAAGCGTGCCGAAAAAATTCATGGAATTTGTTGACAAATCA  
GGAGGCGCAGCAGTGGGTTAGTGGTTGGCGATTAAATGCTGACTCAGTATTGTGGGGGGGCCATAAAGTTTTTCATGGTGAAACCTG  
AAGAGCCTTTTTCAGCCAGTTAAGGAAGCGACTCAACTCATGAATCGTCGTCGCCGTCGCTAA

## Other constant expression plasmid components

### **TetR – 624 bp**

ATGTCAGATTAGATAAAAGTAAAGTGATTAACAGCGCATTAGAGCTGCTTAATGAGGTCGGAATCGAAGGTTTACAACCCGTAA  
ACTCGCCAGAAAGCTAGGTGTAGAGCAGCCTACATTTGTATTGGCATGTAAAAAATAAGCGGGCTTTGCTCGACGCTTAGCCATTG  
AGATGTTAGATAGGCACCATACTCACTTTTGCCTTTTAGAAGGGGAAAGCTGGCAAGATTTTTTACGTAATAACGCTAAAAGTTTT  
AGATGTGCTTTACTAAGTCATCGCGATGGAGCAAAAGTACATTTAGGTACACGGCTACAGAAAAACAGTATGAACTCTCGAAAA  
TCAATTAGCCTTTTTATGCAACAAGGTTTTTCTACTAGAGAATGCATTATATGCACTCAGCGCTGTGGGCGATTTTACTTTAGGTT  
GCGTATTGGAAGATCAAGAGCATCAAGTCGCTAAAGAAGAAAGGGAAACACCTACTACTGATAGTATGCCGCCATTATTACGACAA  
GCTATCGAATTTTATGATCACAAGGTGCAGAGCCAGCCTTCTTATTCGGCCTTGAATTGATCATATGCCGATTAGAAAAACACT  
TAAATGTGAAAGTGGGTCTTAA

**Kan<sup>R</sup> – 816 bp**

ATGAGCCATATTCACGGGAAACGTCTTGCTCGAGGCCGCGATTAAATTCCAACATGGATGCTGATTTATATGGGTATAAAATGGGC  
TCGCGATAATGTCGGGCAATCAGGTGCGACAATCTATCGATTGTATGGGAAGCCCAGATGCGCCAGAGTTGTTTTCTGAAACATGGCA  
AAGGTAGCGTTGCCAATGATGTTACAGATGAGATGGTCAGGCTAAACTGGCTGACGGAATTTATGCCTCTTCCGACCATCAAGCAT  
TTTATCCGTACTCCTGATGATGCATGGTTACTCACCACCTGCGATCCCAGGGAAAACAGCATTCCAGGTATTAGAAGAATATCCTGA  
TTCAGGTGAAAATATTGTTGATGCGCTGGCAGTGTTCCTGCGCCGGTTGCATTCGATTCCTGTTTGTAAATTGTCCTTTTAACGGCG  
ATCGCGTATTTTCGTCTCGCTCAGGCGCAATCACGAATGAATAACGGTTTGGTTGGTGCGAGTGATTTTGATGACGAGCGTAATGGC  
TGGCTGTTGAACAAGTCTGAAAGAAATGCATAAGCTTTTGCCATTCTCACCGGATTCAGTCGTCACCTCATGGTGATTTCTCACT  
TGATAACCTTATTTTTGACGAGGGGAAATTAATAGGTTGTATTGATGTTGGACGAGTCGGAATCGCAGACCGATAACCAGGATCTTG  
CCATCCTATGGAACGCTCGGTGAGTTTTCTCCTTATTACAGAAACGGCTTTTTCAAAAATATGGTATTGATAATCCTGATATG  
AATAAATTGCAGTTTCACTTGATGCTCGATGAGTTTTTCTGA

## **REPORTER PLASMIDS**

### **p5sfGFP (3710 bp) – An example reporter plasmid with Amp<sup>R</sup>**

CGACTGCACGGTGCACCAATGCTTCTGGCGTCAGGCAGCCATCGGAAGCTGTGGTATGGCTGTGCAGGTCGTAAATCACTGCATAA  
TTCGTGTCGCTCAAGGCGCACTCCCGTTCTGGATAATGTTTTTTCGCGCCGACATATAACGGTTCGGCAAATATCTGAAATGAG  
CTGTTGACAGCTAGCTCAGTCCCTAGGTACTGTGCTAGCAATTGTGAGCGGATAACAATTTTCAATTCAAAAGATCTATCGATCGAG  
GATCCAGGAGGTACAATCAATGAGCAAAGGAGAAGAAGCTTTTCTACTGGAGTTGTCCCAATTCTTGTGAATTAGATGGTGATGTTA  
ATGGGCACAAATTTCTGTCCGTGGAGAGGGTGAAGGTGATGCTACAAACGGAAAAGCTCACCCCTAAATTTATTTGCACTACTGGA  
AAACTACCTGTTCCGTGGCCAACACTTGTCACTACTCTGACCTATGGTGTTCATGCTTTTCCCGTTATCCGGATCACATGAAACG  
GCATGACTTTTTCAAGAGTGCATGCCCGAAGGTTATGTACAGGAACGCCTATACTTTCAAAGATGACGGGACCTACAAGACGC  
GTGCTGAAGTCAAGTTTGAAGGTGATACCCTTGTAACTCGTATCGAGTTAAAGGTTATTGATTTTAAAGAAGATGGAAACATTCTT  
GGACACAAACTTGAGTACAACCTTAACTCACACAATGTATACATCACGGCAGACAAAACAAAAGAATGGAATCAAAGCTAACTTCAA  
AATTCGCCACAACGTTGAAGATGGTTCGGTTCAACTAGCAGACCATATCAACAAAATACTCCAATTGGCGATGGCCCTGTCTTTT  
TACCAGACAACCATTACCTGTGACACAATCTGTCTTTTCGAAAGATCCCAACGAAAAGCGTGACCACATGGTCTCTTTGAGTTT  
GTAACGTGCTGCTGGGATTACACATGGCATGGATGAGCTCTACAAATAAGGTACCTCTAGAGTCGACCTGCAGGCATGCAAGCTTGG  
CTGTTTTGGCGGATGAGAGAAGATTTTTCAGCCTGATACAGATTAATCAGAACGCAAGAAGCGGCTGATAAAAACAGAATTTGCCTG  
GCGGCAGTAGCGCGGTGGTCCCACCTGACCCCATGCCGAAGTGAAGTGAACGCGGTAGCGCCGATGGTAGTGTGGGGTCTCCC  
CATGCGAGAGTAGGGAAGTCCAGGCATCAAATAAAACGAAAAGGTCAGTTCGAAAAGACTGGGCCTTTCGTTTTTATCTGTTGTTTTG  
CGGTGAACGCTCTCTGAGTAGGACAAATCCGCCGGGAGCGGATTTGAACGTTGCGAAGCAACGCGCCGAGGGTGGCGGGCAGGA  
CGCCCGCCATAAAGTCCAGGCATCAAATTAAGCAGAAGGCCATCCTGACGGATGGCCTTTTTTCGTTTTCTACAACTCTTTTTTGT  
TTATTTTTCTAAATACATTCAAATATGTATCCGCTCATGAGACAATAACCTGATAAATGCTTCAATAATATTGAAAAGGAAGAG  
TATGAGTATTCAACATTTCCGTGTCCGCTTATTTCCCTTTTTTTCGCGCATTTTTGCTTCTCTGTTTTTGTCTACCCGAAACGCTGG  
TGAAGTAAAAGATGCTGAAGATCAGTTGGGTGCACGAGTGGGTTACATCGAAGTGGATCTCAACAGCGGTAAGATCTTGTGAGAT  
TTTTGCCCCGAAAGACTTTTTCCAATGATGAGCACTTTTAAAGTTCTGCTATGTGGCGCGTATTATGAGCGCGGATTTGACGCCGGCA  
AGAGCAACTCGGTCCCGCATACACTATTCTCAGAATGACTTGGTTGAGTACTCACCAGTACAGAAAAGCATCTTACGGATGGCA  
TGACAGTAAGAGAATTATGCAGTGTGCCATAACCATGAGTGATAAAGTGCAGGCAACTTACTTCTGACAACGATCGGAGGACCG  
AAGGAGCTAACCCTTTTTTGCACAACATGGGGGATCATGTAAGTGCCTTGTATGCTTGGGAACCGGAGCTGAATGAAGCCATACC  
AAACGACGAGCGTGACACCACGATGCCATACAGCAATGGCAACAACGTTGCGCAAATATAAAGTGGCGAACTACTACTCTAGCTT  
CCCGGCAACAATTAATAGACTGGATGGAGGCGGATAAAGTTGCAGGACCACTTCTGCGCTCGGCCCTTCCGGCTGGCTGGTTTTAT  
GCTGATAAATCTGGAGCCGGTGGCGTGGGTCGCGGATCATTGCAGCACTGGGGCCAGATGGTAAGCCCTCCCGTATCGTAGT  
TATCTACAGCAGGGGAGTCAGGCAACTATGGATGAACGAAAATAGACAGATCGCTGAGATAGGTGCTCACTGATTAAGCATTTGGT  
AACTGTCAGACCAAGTTTACTCATATATACTTTAGATTGATTTAAAAGTTCATTTTTTAATTTAAAAGGATCTAGGTGAAGATCCTT  
TTTGATAATCTCATGACCAAAATCCCTAACGTGAGTTTTTCGTTCCACTGAGCGTCAGACCCCGTAGAAAAGATCAAAGGATCTTC  
TTGAGATCCTTTTTTCTGCGCGTAATCTGTCTGCTTGCAAAACAAAAAACCACCGTACCAGCGGTGGTTTTGTTTCCGGATCAAG  
AGCTACCAACTCTTTTTCCGAAGGTAAGTGGCTTACGACAGCGCAGATACAAATACTGTCTTCTAGTGTAGCCGTAGTTAGCG  
CACCCTTCAAGAAGTCTGTAGCACCAGCTACATACCTCGCTCTGCTAATCCTGTTACCAGTGGCTGCTGCCAGTGGCGATAAGTC  
GTGCTTACCAGGTTGACTCAAGACGATAGTTACCAGTAAGGCGCAGCGGTGGGCTGAACGGGGGTTTCGTGCACACAGCCCA  
GCTTGGAGCAGAACGACTACACCAGTACAGCTACAGCGTACAGCTATGAGAAAAGCGCCACGCTTCCCGAAGGGAGAAAAGCGG  
GACAGGTATCCGGTAAAGCGGAGGGTCCGGAACAGGAGAGCGCAGGAGGAGCTTCCAGGGGAAACGCTGGTATCTTTATAGTCC  
TGTCGGGTTTTGCCACCTCTGACTTGAAGCTCGATTTTTGTGATGCTCGTACGGGGGGCGGAGCTATGAAAACGCCAGCAACG  
CGCCTTTTTACGGTTCCTGGCCTTTTGCTGGCCTTTGCTCACAATGTTCTTTCTGCGTTATCCCTGATTCTGTGGATAACCGT  
ATTACCGCTTTGAGTGAGCTGATACCGCTCGCCGAGCCGAACGACCGAGCGCAGCGAGTCACTGAGCGGAGGAAGCGGAAGAGCG  
CCTGATGCGGATTTTTCTCTTACGCATCTGTGCGGATTTTACACCCGCATATGGTGCACCTCTCAGTACAATCTGCTCTGATGCCG  
CATAGTTAAGCCAGTATACACTCCGCTATCGCTACGTGACTGGTTCATGGCTGCGCCCGACCCGCAACACCCGCTGACGCGC  
CCTGACGGGCTTGTCTGCTCCCGCATCCGCTTACAGACAAGCTGTGACCGTCTCCGGGAGCTGCATGTCTCAGAGGTTTTACCG  
TCATCACGAAACGCGGAGGCAGCAGATCAATTCGCGCGGAAGCGGAAGCGGCATGCATTTACGTTGCGAATTGATCTGGTTTTG  
ACAGCTTATCAT

### **sfGFP – 717 bp**

ATGAGCAAAGGAGAAGAAGCTTTTCACTGGAGTTGTCCCAATCTTGTGTAATTAGATGGTGATGTTAATGGGCACAAATTTCTGT  
CCGTGGAGAGGGTGAAGGTGATGCTACAAACGGAAAAGCTCACCCCTAAATTTATTTGCACTACTGAAAAGTACCTGTTCCGTGGC  
CAACTTGTCACTACTCTGACCTATGGTGTTCATGCTTTTCCCGTTATCCGGATCACATGAAACGGCATGACTTTTTCAAGAGT  
GCCATGCCCGAAGGTTATGTACAGGAACGCCTATATCTTTCAAAGATGACGGGACCTACAAGACCGGTGCTGAAGTCAAGTTTGA  
AGGTGATACCCCTTGTAACTCGTATCGAGTTAAAGGTTATTGATTTTAAAGAAGATGGAAACATTTCTGGACACAACTTGAGTACA  
ACTTTAACTCACACAATGTATACATCACGGCAGACAAAACAAAAGAATGGAATCAAAGCTAACTTCAAATTCGCCACAACGTTGAA  
GATGGTTCGGTTCAACTAGCAGACCATATCAACAAAATACTCCAATTGGCGATGGCCCTGTCTTTTACCAGACAACCATTACCT  
GTCGACACAATCTGTCTTTTCAAAGATCCCAACGAAAAGCGTGACCACATGGTCTTCTTGGATTGTAAGTGTGCTGGGATTA  
CACATGGCATGGATGAGCTCTACAAATAA

### **mCherry – 711 bp**

ATGGTGAGCAAGGGCGAGGAGGATAACATGGCCATCATCAAGGAGTTCATGCGCTTCAAGGTGCACATGGAGGGCTCCGTGAACGG  
CCACGAGTTCGAGATCGAGGGCGAGGGCGAGGGCCGCCCTACGAGGGCACCCAGACCGCCAAGCTGAAGGTGACCAAGGGTGGCC  
CCCTGCCCTTCGCCTGGGACATCCTGTCCCCTCAGTTCATGTACGGCTCCAAGGCCTACGTGAAGCACCCCGCGACATCCCCGAC  
TACTTGAAGCTGTCTTCCCCGAGGGCTTCAAGTGGGAGCGCGTGATGAACTTCGAGGACGGCGGCGTGGTGACCGTGACCCAGGA  
CTCCTCCCTGCAGGACGGCGAGTTCATCTACAAGGTGAAGCTGCGCGGCACCAACTTCCCCTCCGACGGCCCCGTAATGCAGAAGA  
AGACCATGGGCTGGGAGGCCCTCCTCCGAGCGGATGTACCCCGAGGACGGCGCCCTGAAGGGCGAGATCAAGCAGAGGCTGAAGCTG  
AAGACGGCGGCCACTACGACGCTGAGGTCAAGACCACCTACAAGGCCAAGAAGCCCGTGCAGCTGCCCGCGCCTACAACGTCAA  
CATCAAGTTGGACATCACCTCCCACAACGAGGACTACACCATCGTGGAACAGTACGAACGCGCCGAGGGCCGCCACTCCACCGGGC  
GCATGGACGAGCTGTACAAGTAA

### **TALE binding regions**

**lac operator** - AATTGTGAGCGGATAACAATT

**lysA operator** - TCTTTTTATGATGTGGCGTAATC
